# Supplementary material for: Transcriptional Profiling of Canker-Resistant Transgenic Sweet Orange (Citrus sinensis Osbeck) Constitutively Overexpressing a Spermidine Synthase Gene
Source: Biomed Res Int. 2012 Dec 27;2013:918136. doi: 10.1155/2013/918136 (PMC3591164; doi:10.1155/2013/918136)
Supplement: Supplementary file 1 — Supplemental Table S1: List of significantly upregulated genes in TG9 as comparing with WT. Fold-change = TG9/WT. Supplemental Table S2: List of significantly downregulated genes in TG9 as compared with WT. Fold-change = TG9/WT. Supplemental Table S3: KEGG pathways of the upregulated DEGs in TG9. [file 918136.f1.xls]

## Sheet: Supplemental Table 1
Supplemental Table S1: List of significantly upregulated genes in TG9 as compared with WT. Fold-change = TG9/WT.
Gene ID	Seq. Description	Hit ACC	Expression levels			p-value	#GOs	Gos
			WT	TG9	Fold change
Cit.8163.1.S1_x_at	cysteine proteinase	P37842	9.6009	2574.18	268.124	1.17195e-06	3	F:cysteine-type endopeptidase inhibitor activity; C:intracellular; C:cell wall
Cit.30421.1.S1_s_at	cysteine proteinase inhibitor	AAG38521	12.7221	1203.32	94.5823	5.7558e-06	3	F:cysteine-type endopeptidase inhibitor activity; C:intracellular; C:cell wall
Cit.28011.1.S1_x_at	cysteine proteinase	AAG38521	11.0233	945.426	85.7665	3.75372e-06	2	F:cysteine-type endopeptidase inhibitor activity; C:cell wall
Cit.60.1.S1_at	lipid transfer protein	AAF61436	18.6775	894.818	47.9087	0.000264698	1	P:transport
Cit.10816.1.S1_at	transcription factor	CAN84058	15.5433	290.495	18.6895	0.00287611	2	F:DNA binding; P:transcription
Cit.23566.1.S1_at	na+ h+ antiporter	AAM08407	8.88086	125.449	14.1258	0.000105691	6	F:sodium ion transmembrane transporter activity; P:lithium ion transport; F:sodium:hydrogen antiporter activity; P:regulation of pH; C:integral to membrane; P:sodium ion transport
Cit.19161.1.S1_at	lipid binding	XP_002304367	23.6292	315.801	13.3648	0.000186194	2	C:mitochondrion; F:lipid binding
Cit.18730.1.S1_at	---NA---		19.3932	240.61	12.4069	0.0167122	0
Cit.26116.1.S1_at	cytochrome p450	CBI34719	51.0989	633.544	12.3984	0.0137768	4	C:cytoplasmic membrane-bounded vesicle; F:oxidoreductase activity; F:iron ion binding; F:oxygen binding
Cit.4425.1.S1_at	cytochrome p450	XP_002276655	26.5796	272.798	10.2634	0.0227087	4	F:oxidoreductase activity, acting on paired donors, with incorporation or reduction of molecular oxygen, NADH or NADPH as one donor, and incorporation of one atom of oxygen; P:glucosinolate biosynthetic process; F:iron ion binding; F:oxygen binding
Cit.20572.1.S1_x_at	---NA---		38.6281	355.21	9.19563	0.0148187	0
Cit.15242.1.S1_at	class iv chitinase	ACZ52964	42.301	380.568	8.99665	0.034656	4	F:chitinase activity; P:cell wall macromolecule catabolic process; F:chitin binding; P:chitin catabolic process
Cit.18386.1.S1_at	lipid transfer protein	AAF61436	15.4746	136.768	8.83829	0.00480954	1	P:transport
Cit.8878.1.S1_at	major allergen pru	ABK06393	19.9166	171.908	8.63139	0.00655641	4	F:hydrolase activity; P:defense response; P:metabolic process; P:response to biotic stimulus
Cit.19313.1.S1_at	---NA---		117.043	998.66	8.53235	0.007685	0
Cit.34907.1.S1_x_at	predicted protein [Populus trichocarpa]	XP_002327722	164.784	1369.28	8.30943	0.00179352	0
Cit.27468.1.S1_at	cytochrome p450	XP_002299579	43.2432	344.978	7.97757	0.0203036	4	F:heme binding; P:oxidation reduction; F:monooxygenase activity; F:electron carrier activity
Cit.18556.1.S1_at	---NA---		20.5586	163.961	7.9753	0.0306677	0
Cit.12518.1.S1_at	protein	XP_002317695	16.3594	129.071	7.88971	0.00324062	0
Cit.19313.1.S1_s_at	---NA---		101.632	743.521	7.31581	0.00725721	0
Cit.15404.1.S1_at	protein	XP_002522070	63.8449	463.151	7.25428	0.0268335	1	C:extracellular region
Cit.14999.1.S1_s_at	unnamed protein product [Vitis vinifera]	CBI20517	54.7926	396.171	7.23038	0.000926056	0
Cit.1406.1.S1_s_at	---NA---		401.073	2659.43	6.63064	0.0200188	0
Cit.16280.1.S1_at	PREDICTED: hypothetical protein [Vitis vinifera]	XP_002271277	36.7841	236.827	6.43831	0.00281385	0
Cit.18251.1.S1_at	hypothetical protein [Vitis vinifera]	CAN75524	46.4987	299.139	6.43326	0.0407684	0
Cit.5734.1.S1_at	cell wall invertase	CBI35961	30.5237	181.189	5.93601	0.0033035	2	F:beta-fructofuranosidase activity; P:carbohydrate metabolic process
Cit.12866.1.S1_x_at	predicted protein [Populus trichocarpa]	XP_002327722	356.063	2098	5.89232	0.00132651	0
Cit.11548.1.S1_at	thaumatin-like protein	Q9SMH2	27.2118	158.986	5.84254	0.0386498	3	P:defense response to fungus; C:apoplast; P:xenobiotic metabolic process
Cit.11460.1.S1_at	zinc iron	XP_002264621	27.2182	157.485	5.78602	0.00818666	3	C:integral to membrane; P:zinc ion transport; F:zinc ion transmembrane transporter activity
Cit.5956.1.S1_s_at	blight-associated protein p12 precursor	XP_002309373	101.321	581.522	5.73941	0.0351464	1	C:cytoplasmic membrane-bounded vesicle
Cit.11459.1.S1_s_at	zinc iron	XP_002264707	307.152	1737.14	5.65577	0.0288551	3	C:integral to membrane; P:zinc ion transport; F:zinc ion transmembrane transporter activity
Cit.4426.1.S1_at	homogentisate geranyl geranyl transferase	XP_002282953	173.449	976.597	5.63043	0.0350137	9	P:vitamin E biosynthetic process; P:phloem loading; F:homogentisate phytyltransferase activity; P:regulation of defense response; P:cell wall organization; P:unsaturated fatty acid biosynthetic process; C:chloroplast; C:membrane; P:response to temperature
Cit.9703.1.S1_at	beta-1,3-glucanase	CAA03908	611.691	3335.99	5.45386	0.0363961	7	P:carbohydrate metabolic process; C:extracellular region; P:defense response; C:vacuole; F:glucan endo-1,3-beta-D-glucosidase activity; P:response to biotic stimulus; F:cation binding
Cit.33610.1.S1_at	protein	XP_002280711	75.2286	406.339	5.40139	0.0283581	0
Cit.15185.1.S1_at	protein	XP_002266481	23.0201	123.871	5.38098	0.00623168	2	F:molecular_function; P:biological_process
Cit.30299.1.S1_at	cytochrome p450	NP_568153	18.618	99.9802	5.37008	0.0499382	6	F:oxidoreductase activity, acting on paired donors, with incorporation or reduction of molecular oxygen, NADH or NADPH as one donor, and incorporation of one atom of oxygen; P:glucosinolate biosynthetic process; F:electron carrier activity; F:heme binding
Cit.29880.1.S1_at	atp binding	XP_002517441	192.805	1032.27	5.3541	0.0440587	8	C:chloroplast envelope; F:ATPase activity; F:ATP:ADP antiporter activity; F:ATP binding; P:response to abscisic acid stimulus; C:membrane; C:endoplasmic reticulum; P:cell division
Cit.28234.1.S1_at	---NA---		39.5674	209.132	5.28548	0.0497752	0
Cit.20572.1.S1_at	---NA---		11.9554	62.87	5.25872	0.0227058	0
Cit.19161.1.S1_x_at	lipid binding	XP_002304367	52.208	273.954	5.24735	0.000694643	2	C:mitochondrion; F:lipid binding
Cit.29404.1.S1_at	cytochrome p450	XP_002329895	46.1385	239.687	5.19497	0.00428311	2	F:oxidoreductase activity; F:iron ion binding
Cit.29956.1.S1_at	---NA---		25.1312	129.17	5.13983	0.0022755	0
Cit.29404.1.S1_x_at	cytochrome p450	XP_002329895	50.6714	259.261	5.11651	0.00178169	2	F:oxidoreductase activity; F:iron ion binding
Cit.6954.1.S1_at	glutathione s-transferase, putative	XP_002523996	42.8054	218.331	5.10052	0.0461597	1	F:transferase activity
Cit.6308.1.S1_at	glutathione s-transferase, putative	XP_002523996	97.9151	497.344	5.07934	0.0025957	1	F:transferase activity
Cit.14998.1.S1_at	ankyrin repeat family protein	CBI20517	43.8456	220.478	5.02849	0.00216059	0
Cit.23352.1.S1_at	protein	XP_002331797	21.3442	106.807	5.00402	0.00587953	1	F:protein binding
Cit.10425.1.S1_s_at	protein	XP_002325927	802.596	3978.48	4.95712	0.0414506	1	C:plastid
Cit.17265.1.S1_at	glycine-rich protein	BAA92155	335.833	1640.36	4.88464	0.0408805	0
Cit.4504.1.S1_at	thiamin biosynthesis protein	XP_002525602	95.3995	461.36	4.83609	0.004485	5	P:response to vitamin B1; F:iron-sulfur cluster binding; C:chloroplast stroma; F:catalytic activity; P:thiamin biosynthetic process
Cit.26579.1.S1_at	---NA---		13.741	66.1532	4.81431	0.0055202	0
Cit.23498.1.S1_s_at	zip transporter	AAR08412	12.3675	57.6049	4.65777	0.00437812	3	C:integral to membrane; P:zinc ion transport; F:zinc ion transmembrane transporter activity
Cit.14918.1.S1_at	basic 7s globulin 2 precursor small	XP_002517165	58.863	274.165	4.6577	0.022147	3	C:membrane; C:plant-type cell wall; P:response to salt stress
Cit.21616.1.S1_at	abc transporter	CBI40242	29.8765	138.633	4.6402	0.00200507	4	P:multidrug transport; F:ATPase activity, coupled to transmembrane movement of substances; C:plasma membrane; F:nucleotide binding
Cit.18242.1.S1_s_at	---NA---		495.493	2278.08	4.59761	0.0352299	0
Cit.17025.1.S1_at	cytochrome p450	XP_002329895	62.1374	282.93	4.55328	0.00182622	2	F:oxidoreductase activity; F:iron ion binding
Cit.9706.1.S1_s_at	beta-1,3-glucanase	ABQ45848	152.862	694.018	4.54013	0.021831	5	P:carbohydrate metabolic process; C:extracellular region; P:response to stimulus; F:glucan endo-1,3-beta-D-glucosidase activity; F:cation binding
Cit.28124.1.S1_at	protein	XP_002531443	18.3386	82.8873	4.51984	0.0286462	0
Cit.5367.1.S1_at	---NA---		637.34	2878.7	4.51679	0.00858391	0
Cit.6247.1.S1_s_at	protein	XP_002305073	879.488	3950.72	4.49201	0.0428223	2	P:proteolysis; F:cysteine-type peptidase activity
Cit.29872.1.S1_at	protein	XP_002305327	152.074	682.687	4.48917	0.0312955	3	F:carbohydrate binding; F:isomerase activity; P:galactose metabolic process
Cit.31341.1.S1_at	protein	XP_002518184	30.5958	137.342	4.48892	0.0316203	1	F:transferase activity
Cit.1820.1.S1_at	nucleic acid binding	XP_002533110	34.0544	148.25	4.35333	0.0238415	2	F:zinc ion binding; C:intracellular
Cit.7295.1.S1_at	protein	XP_002520485	63.5011	274.808	4.32761	0.0051446	3	C:chloroplast; P:biological_process; P:response to oxidative stress
Cit.38637.1.S1_at	protein	XP_002517054	16.0533	68.2965	4.25433	0.0468149	4	P:calcium-mediated signaling; F:calcium ion binding; F:protein binding; P:detection of calcium ion
Cit.28251.1.S1_at	protein	XP_002315928	89.2593	378.692	4.2426	0.0308265	2	F:molecular_function; P:biological_process
Cit.5856.1.S1_at	thioredoxin-like 5	XP_002322732	30.5039	129.334	4.23993	0.00423595	1	C:plastid
Cit.12653.1.S1_x_at	---NA---		649.11	2734.95	4.21345	0.00238865	0
Cit.3136.1.S1_at	protein	XP_002268087	570.297	2399.8	4.2081	0.0266362	5	P:protein amino acid phosphorylation; F:protein binding; F:protein kinase activity; F:ATP binding; C:plastid
Cit.17307.1.S1_at	peroxisomal membrane protein pmp22	NP_001031637	26.273	110.51	4.20619	0.00146126	1	C:integral to membrane
Cit.23438.1.S1_s_at	atp binding	XP_002268087	433.308	1807.27	4.17098	0.0476505	4	P:protein amino acid phosphorylation; F:protein binding; F:protein kinase activity; F:ATP binding
Cit.17316.1.S1_s_at	thioredoxin-like 5	XP_002322732	43.3807	180.002	4.14935	0.000410216	2	P:cell redox homeostasis; C:plastid
Cit.28608.1.S1_at	amino acid transporter	CBI21593	150.369	617.63	4.10744	0.000767569	3	C:integral to membrane; P:amino acid transport; F:amino acid transmembrane transporter activity
Cit.7094.1.S1_at	protein	XP_002280623	64.6501	264.252	4.08744	0.00555014	3	C:endomembrane system; C:cytoplasmic membrane-bounded vesicle; P:biological_process
Cit.11394.1.S1_s_at	protein	XP_002314527	79.404	323.318	4.07182	0.0314763	1	F:transferase activity
Cit.29872.1.S1_s_at	protein	XP_002305327	232.534	945.059	4.06418	0.0328069	3	F:carbohydrate binding; F:isomerase activity; P:galactose metabolic process
Cit.3171.1.S1_x_at	nitrate	XP_002266777	13.4584	53.9059	4.00539	0.0240167	3	C:membrane; P:oligopeptide transport; F:transporter activity
Cit.7691.1.S1_at	---NA---		19.5056	77.681	3.98248	0.00301651	0
Cit.12979.1.S1_at	Jasmonate O-methyltransferase, putative	CBI28448	138.366	547.726	3.95852	0.0202947	2	F:methyltransferase activity; F:transferase activity
Cit.28117.1.S1_s_at	aspartyl protease family protein	ABK28718	970.934	3823.03	3.93758	0.00198799	5	P:defense response to bacterium; P:regulation of salicylic acid metabolic process; P:regulation of hydrogen peroxide metabolic process; F:aspartic-type endopeptidase activity; C:apoplast
Cit.15995.1.S1_at	---NA---		26.2221	102.796	3.92022	0.0321424	0
Cit.21495.1.S1_at	---NA---		106.591	416.854	3.91079	0.0083872	0
Cit.11731.1.S1_s_at	hexose transporter	XP_002281683	238.855	932.067	3.90223	0.029827	4	C:plasma membrane; P:transmembrane transport; C:integral to membrane; F:high-affinity hydrogen:glucose symporter activity
Cit.3359.1.S1_at	PREDICTED: hypothetical protein [Vitis vinifera]	XP_002280988	12.6564	49.3432	3.89869	0.00133371	0
Cit.17803.1.S1_at	---NA---		646.779	2507.96	3.87759	0.0104262	0
Cit.3359.1.S1_s_at	PREDICTED: hypothetical protein [Vitis vinifera]	XP_002280988	172.721	668.98	3.87319	0.000969708	0
Cit.3949.1.S1_s_at	copper zinc superoxide dismutase	ACC93637	1191.28	4589.43	3.85253	0.0406077	16	P:translation; P:response to oxidative stress; F:copper ion binding; F:zinc ion binding; P:response to light stimulus; P:response to iron ion; P:oxidation reduction; F:structural constituent of ribosome; F:superoxide dismutase activity; F:peroxidase activ
Cit.6545.1.S1_at	unnamed protein product [Vitis vinifera]	CBI25424	530.997	2034.42	3.8312	0.011407	0
Cit.24350.1.S1_at	phospholipase c	ABJ99758	17.3516	66.3953	3.82647	0.00589063	5	F:signal transducer activity; P:intracellular signaling cascade; F:calcium ion binding; P:lipid metabolic process; F:phosphoinositide phospholipase C activity
Cit.7344.1.S1_at	rpp27 protein	XP_002517677	28.7709	107.831	3.74791	0.0310691	1	P:signal transduction
Cit.4233.1.S1_s_at	protein	XP_002332433	66.2193	246.033	3.71542	0.0281333	0
Cit.27468.1.S1_s_at	cytochrome p450	XP_002299579	23.9062	88.6101	3.70661	0.0202002	4	F:heme binding; P:oxidation reduction; F:monooxygenase activity; F:electron carrier activity
Cit.17438.1.S1_at	protein	XP_002284819	15.5597	57.5594	3.69927	0.0216567	2	P:response to oxidative stress; C:plasma membrane
Cit.10266.1.S1_at	60s ribosomal protein	XP_002519752	100.824	372.251	3.69207	0.00531726	3	C:ribosome; F:structural constituent of ribosome; P:translation
Cit.22916.1.S1_at	---NA---		12.3303	45.274	3.67175	0.000199052	0
Cit.12005.1.S1_s_at	atp-binding cassette	CBI40242	41.6964	152.535	3.65824	0.00912404	4	P:multidrug transport; F:ATPase activity, coupled to transmembrane movement of substances; C:plasma membrane; F:nucleotide binding
Cit.19070.1.S1_at	protein	XP_002331015	26.7445	97.5446	3.64727	0.0315646	2	P:flavonoid biosynthetic process; F:oxidoreductase activity, acting on paired donors, with incorporation or reduction of molecular oxygen, 2-oxoglutarate as one donor, and incorporation of one atom each of oxygen into both donors
Cit.18435.1.S1_at	receptor protein	CAN68996	65.0961	237.35	3.64614	0.00967268	3	F:protein kinase activity; C:mitochondrion; F:nucleotide binding
Cit.6364.1.S1_s_at	peptidase m	XP_002518664	60.4575	220.394	3.64541	0.000119948	8	C:endomembrane system; P:innate immune response; P:apoptosis; C:intrinsic to membrane; F:ATP binding; P:signal transduction; F:nucleoside-triphosphatase activity; F:transmembrane receptor activity
Cit.12432.1.S1_at	lectin-like protein	XP_002271399	19.3938	70.5713	3.63888	0.0339132	1	F:carbohydrate binding
Cit.29252.1.S1_s_at	disease resistance protein	AAL85347	238.751	862.147	3.61109	0.0279402	2	P:lipid metabolic process; F:triacylglycerol lipase activity
Cit.4504.1.S1_s_at	thiamin biosynthesis protein	XP_002525602	264.219	953.811	3.60992	0.00197418	5	P:response to vitamin B1; F:iron-sulfur cluster binding; C:chloroplast stroma; F:catalytic activity; P:thiamin biosynthetic process
Cit.10310.1.S1_at	transmembrane protein	XP_002529148	37.9822	136.661	3.59804	0.00181399	1	C:integral to membrane
Cit.12652.1.S1_at	---NA---		30.6187	108.963	3.55871	0.00631939	0
Cit.27793.1.S1_at	protein	XP_002332812	16.8777	59.9102	3.54964	0.00170881	0
Cit.39117.1.S1_at	flavonol synthase flavanone 3-	XP_002323963	48.8711	170.918	3.49732	0.047576	3	P:oxidation reduction; F:oxidoreductase activity; F:iron ion binding
Cit.21359.1.S1_at	af446875_1 at5g05220 k18i23_2	XP_002520889	57.6257	201.337	3.49387	0.0217016	2	C:mitochondrion; P:biological_process
Cit.11209.1.S1_s_at	nematode-resistance protein	XP_002268520	97.7605	340.188	3.47979	0.00885391	3	P:defense response to bacterium, incompatible interaction; P:response to salicylic acid stimulus; P:response to oxidative stress
Cit.35774.1.S1_at	endo beta n-	CBI25424	16.7542	58.0683	3.4659	0.00117391	0
Cit.24884.1.S1_at	soluble diacylglycerol acyltransferase	XP_002314335	93.7489	322.615	3.44128	0.0418184	5	C:endomembrane system; F:diacylglycerol O-acyltransferase activity; F:acyltransferase activity; F:transferase activity; P:biological_process
Cit.5493.1.S1_s_at	protein	XP_002531574	54.9276	188.548	3.43265	0.00312254	1	P:shoot development
Cit.24017.1.S1_at	cytochrome	XP_002511294	71.9658	245.865	3.41641	0.00192953	3	F:oxidoreductase activity; F:iron ion binding; C:membrane
Cit.22718.1.S1_at	serine carboxypeptidase ii	XP_002312024	911.166	3088.31	3.38932	0.00220925	4	F:serine-type carboxypeptidase activity; C:cytoplasmic membrane-bounded vesicle; P:proteolysis; C:mitochondrion
Cit.11918.1.S1_x_at	protein	XP_002530077	91.7572	310.75	3.38666	0.0301355	3	F:oxidoreductase activity; P:metabolic process; F:monooxygenase activity
Cit.38799.1.S1_at	---NA---		25.5045	86.254	3.38192	0.0059321	0
Cit.24791.1.S1_x_at	---NA---		16.4681	55.6697	3.38046	0.00193477	0
Cit.16085.1.S1_at	vq motif-containing protein	XP_002310889	149.122	503.672	3.37759	0.0323077	2	C:chloroplast; P:biological_process
Cit.17124.1.S1_at	ap2 erf domain-containing transcription factor	NP_182011	232.092	781.239	3.3661	0.00782078	5	P:response to chitin; F:transcription factor activity; P:ethylene mediated signaling pathway; C:nucleus; P:regulation of transcription, DNA-dependent
Cit.23622.1.S1_s_at	PREDICTED: hypothetical protein [Vitis vinifera]	XP_002281106	220.951	738.037	3.34027	0.0303969	0
Cit.35636.1.S1_s_at	at3g16530 mdc8_16	XP_002262662	41.7406	138.107	3.30867	0.0234661	6	F:binding; C:plant-type cell wall; P:response to chitin; F:kinase activity; C:nucleus; C:apoplast
Cit.7238.1.S1_at	---NA---		214.956	710.061	3.30329	0.0359137	0
Cit.12516.1.S1_x_at	protein	XP_002330609	14.9804	49.3826	3.29648	0.00886128	0
Cit.1496.1.S1_s_at	nac domain ipr003441	ACD39371	174.266	572.606	3.28581	0.0250283	2	P:regulation of transcription; F:DNA binding
Cit.18493.1.S1_at	---NA---		36.24	118.191	3.26135	0.00586629	0
Cit.18722.1.S1_at	---NA---		34.4906	111.625	3.23638	0.0361072	0
Cit.34418.1.S1_at	---NA---		57.4307	184.966	3.22069	0.0331365	0
Cit.15253.1.S1_s_at	mads-domain transcription factor	XP_002273223	20.7303	66.6711	3.21612	0.0319632	4	F:sequence-specific DNA binding; F:transcription factor activity; C:nucleus; P:regulation of transcription, DNA-dependent
Cit.7937.1.S1_at	wrky transcription	XP_002272504	1126.94	3612.29	3.20558	0.0069839	3	P:regulation of transcription; F:DNA binding; C:cell part
Cit.10391.1.S1_at	nucleic acid binding	CBI27136	288.825	924.943	3.20243	0.0127642	7	C:nucleolus; P:endonucleolytic cleavages during rRNA processing; P:cotyledon vascular tissue pattern formation; F:nucleic acid binding; P:leaf vascular tissue pattern formation; P:root development; P:leaf development
Cit.11918.1.S1_at	protein	XP_002530077	85.4436	271.869	3.18186	0.0492403	3	F:oxidoreductase activity; P:metabolic process; F:monooxygenase activity
Cit.21705.1.S1_s_at	---NA---		37.5937	119.521	3.17928	0.0033905	0
Cit.23400.1.S1_at	lipid binding	XP_002519855	25.7106	81.6828	3.17702	0.000200738	2	C:mitochondrion; F:lipid binding
Cit.17272.1.S1_s_at	af446875_1 at5g05220 k18i23_2	XP_002520889	66.8034	211.712	3.16917	0.0126692	2	C:mitochondrion; P:biological_process
Cit.29252.1.S1_at	disease resistance protein	AAL85347	83.0248	262.174	3.15776	0.0260571	2	P:lipid metabolic process; F:triacylglycerol lipase activity
Cit.36204.1.S1_s_at	fructose-bisphosphate aldolase-like protein	AAF61436	15.5176	48.4391	3.12155	0.0275658	3	P:transport; P:glycolysis; F:fructose-bisphosphate aldolase activity
Cit.2981.1.S1_at	ring finger	XP_002522602	52.4412	163.076	3.10968	0.0330161	3	F:metal ion binding; F:zinc ion binding; F:protein binding
Cit.18986.1.S1_s_at	---NA---		16.1106	50.058	3.10715	0.0067146	0
Cit.20851.1.S1_s_at	crr3 (chlororespiratory reduction 3)	XP_002284679	48.4656	150.486	3.10502	0.0302242	3	P:photosynthetic electron transport in photosystem I; C:chloroplast; C:NAD(P)H dehydrogenase complex (plastoquinone)
Cit.4212.1.S1_at	dna-directed rna polymerase ii kda polypeptide	XP_002263065	355.854	1103.22	3.10031	6.85644e-05	5	F:DNA-directed RNA polymerase activity; F:DNA binding; P:regulation of transcription; C:nucleus; F:zinc ion binding
Cit.30276.1.S1_at	---NA---		35.6651	110.06	3.08594	0.00586062	0
Cit.38351.1.S1_at	transparent testa 12	XP_002314825	20.0945	61.6325	3.06713	0.0105524	1	F:transporter activity
Cit.20000.1.S1_at	protein	CBI35045	364.016	1104.21	3.03347	0.0494464	1	F:transferase activity
Cit.28107.1.S1_at	molybdopterin synthase	XP_002512188	27.445	83.2362	3.03284	4.22476e-05	7	F:metal ion binding; P:Mo-molybdopterin cofactor biosynthetic process; F:4 iron, 4 sulfur cluster binding; C:chloroplast; C:molybdopterin synthase complex; F:catalytic activity; C:mitochondrion
Cit.28027.1.S1_at	33 kda secretory protein	XP_002533056	84.4029	255.371	3.02561	0.00574958	2	C:endomembrane system; C:cytoplasmic membrane-bounded vesicle
Cit.16828.1.S1_at	protein	XP_002328954	481.369	1455.6	3.02379	0.00102656	4	C:membrane; C:plastid; P:transport; F:transmembrane transporter activity
Cit.19279.1.S1_at	---NA---		17.953	53.8849	3.00146	0.0308225	0
Cit.9584.1.S1_x_at	glutathione s-transferase	XP_002273830	692.735	2078.61	3.00065	0.000398124	3	P:toxin catabolic process; C:cytoplasm; F:glutathione transferase activity
Cit.10453.1.S1_s_at	---NA---		1729.33	5177	2.99363	0.0171421	0
Cit.4541.1.S1_s_at	conserved hypothetical protein [Ricinus communis]	XP_002514207	1570.38	4675.81	2.9775	0.0122079	0
Cit.18277.1.S1_at	multidrug resistance protein abc transporter family	XP_002312645	37.0284	110.124	2.97404	0.0479305	6	F:chlorophyll catabolite transporter activity; C:plasma membrane; C:vacuolar membrane; F:glutathione S-conjugate-exporting ATPase activity; C:apoplast; F:nucleotide binding
Cit.18651.1.S1_at	---NA---		46.3713	137.111	2.9568	0.00402726	0
Cit.6986.1.S1_at	protein	XP_002513974	30.1315	88.7484	2.94536	0.028928	4	F:protein kinase activity; F:ATP binding; P:protein amino acid phosphorylation; F:protein serine/threonine kinase activity
Cit.6186.1.S1_at	set domain protein	XP_002520307	110.665	324.137	2.92899	0.00326519	6	P:secondary shoot formation; F:histone methyltransferase activity (H3-K4 specific); P:negative regulation of flower development; P:positive regulation of histone methylation; P:carotenoid metabolic process; P:regulation of gene expression, epigenetic
Cit.14168.1.S1_at	alcohol dehydrogenase	XP_002285748	74.6655	218.241	2.92291	0.00966788	3	F:zinc ion binding; P:oxidation reduction; F:oxidoreductase activity
Cit.9587.1.S1_at	glutathione s-transferase	XP_002273830	77.2905	225.478	2.91727	0.00195607	3	P:toxin catabolic process; C:cytoplasm; F:glutathione transferase activity
Cit.25402.1.S1_a_at	phosphoribosylanthranilate isomerase	XP_002311229	61.4078	178.946	2.91405	0.00301566	3	F:phosphoribosylanthranilate isomerase activity; C:chloroplast; P:tryptophan biosynthetic process
Cit.23598.1.S1_s_at	---NA---		1154.62	3351.52	2.90271	0.00231161	0
Cit.916.1.S1_at	protein	XP_002525204	11.1921	32.3919	2.89418	0.0183538	2	F:transferase activity; P:response to cadmium ion
Cit.27913.1.S1_at	26s proteasome regulatory subunit	ACX45995	55.9812	162.017	2.89415	0.00579599	6	C:eukaryotic translation initiation factor 3 complex; P:translational initiation; F:translation initiation factor activity; C:membrane; C:nucleus; C:cytosol
Cit.1243.1.S1_at	ubiquitin-conjugating enzyme e2-17 kda	CBI32005	374.237	1077.82	2.87998	0.00115546	4	P:modification-dependent protein catabolic process; P:regulation of protein metabolic process; P:post-translational protein modification; F:small conjugating protein ligase activity
Cit.16035.1.S1_at	#NAME?	XP_002327752	75.3393	216.527	2.87403	0.0261657	1	F:heat shock protein binding
Cit.27224.1.S1_at	serine-threonine protein plant-	XP_002532098	25.1262	71.9613	2.86398	0.010992	2	F:kinase activity; F:protein binding
Cit.5508.1.S1_x_at	---NA---		165.018	470.94	2.85387	0.0151645	0
Cit.29984.1.S1_at	protein	XP_002284819	67.533	192.142	2.84517	0.0330679	0
Cit.15030.1.S1_at	protein	XP_002514910	323.188	917.44	2.83872	0.0191779	2	F:catalytic activity; F:pyridoxal phosphate binding
Cit.18238.1.S1_at	---NA---		88.9221	251.599	2.82942	0.0406635	0
Cit.12431.1.S1_at	phloem protein 2	XP_002523985	65.5208	185.147	2.82578	0.0416355	1	F:carbohydrate binding
Cit.31147.1.S1_at	disease resistance protein	CAN77656	47.2778	133.487	2.82347	0.0256487	2	P:defense response; F:binding
Cit.9704.1.S1_at	beta- -glucanase	ABQ45848	36.0326	100.753	2.79617	0.0224323	5	P:carbohydrate metabolic process; C:extracellular region; P:response to stimulus; F:glucan endo-1,3-beta-D-glucosidase activity; F:cation binding
Cit.5329.1.S1_at	protein	XP_002279060	61.3198	171.176	2.79153	0.0216835	1	C:mitochondrion
Cit.16432.1.S1_at	hypothetical protein [Vitis vinifera]	CAN71206	26.2468	73.2517	2.79088	0.00232839	0
Cit.20853.1.S1_at	citrate synthase	ACU42176	37.4159	104.418	2.79073	0.0407419	9	P:cellular carbohydrate metabolic process; P:response to cadmium ion; F:ATP citrate synthase activity; C:mitochondrial matrix; F:citrate (Si)-synthase activity; F:ATP binding; P:tricarboxylic acid cycle; F:lyase activity; C:chloroplast
Cit.23542.1.S1_at	protein	XP_002314767	33.0567	92.1562	2.78783	0.00466243	7	F:sugar binding; P:protein amino acid phosphorylation; C:plasma membrane; F:protein binding; P:recognition of pollen; F:ATP binding; F:protein serine/threonine kinase activity
Cit.39509.1.S1_s_at	mee14 (maternal effect embryo arrest 14)	XP_002519150	78.0004	217.114	2.7835	0.00598948	1	P:embryonic development ending in seed dormancy
Cit.30479.1.S1_x_at	lysine decarboxylase-like protein	EEC67178	121.894	337.799	2.77126	0.0133452	1	C:mitochondrion
Cit.705.1.S1_at	copper zinc-superoxide dismutase	AAQ14591	394.196	1088.03	2.76017	0.00534078	7	F:copper ion binding; P:oxidation reduction; C:cytoplasm; P:superoxide metabolic process; F:superoxide dismutase activity; F:antioxidant activity; F:zinc ion binding
Cit.9510.1.S1_s_at	glutathione s-transferase	XP_002530205	2118.17	5836.55	2.75554	0.00179043	15	F:copper ion binding; C:cell wall; F:zinc ion binding; F:nucleic acid binding; P:response to water deprivation; P:defense response to bacterium; F:glutathione peroxidase activity; F:glutathione transferase activity; C:chloroplast stroma; F:glutathione bin
Cit.2555.1.S1_at	soluble diacylglycerol acyltransferase	XP_002519339	650.16	1789.2	2.75188	0.0127961	1	F:transferase activity
Cit.9942.1.S1_x_at	cinnamyl alcohol dehydrogenase-like protein	XP_002322761	80.8867	221.73	2.74125	0.0400818	3	F:zinc ion binding; P:oxidation reduction; F:mannitol dehydrogenase activity
Cit.20495.1.S1_at	pathogenesis-related protein pr10a	XP_002328585	12.3273	33.7805	2.74029	0.00769641	8	P:response to biotic stimulus; F:ATP binding; P:defense response; F:nucleotide binding; F:microtubule motor activity; F:motor activity; C:microtubule associated complex; P:microtubule-based movement
Cit.19776.1.S1_at	serine-threonine protein plant-	XP_002280075	187.012	511.379	2.73445	0.0306197	2	F:binding; F:protein kinase activity
Cit.17124.1.S1_s_at	ap2 erf domain-containing transcription factor	NP_182011	159.32	434.62	2.72797	0.00490255	5	P:response to chitin; F:transcription factor activity; P:ethylene mediated signaling pathway; C:nucleus; P:regulation of transcription, DNA-dependent
Cit.9383.1.S1_at	19-like protein	XP_002511073	41.6597	113.609	2.72707	0.00177774	2	C:cytoplasmic membrane-bounded vesicle; C:vacuole
Cit.7100.1.S1_at	hypothetical protein MtrDRAFT_AC167711g44v2 [Medicago truncatula]	ABN09802	170.04	461.658	2.715	0.00666041	0
Cit.104.1.S1_at	---NA---		20.9489	56.8642	2.71443	0.0380894	0
Cit.18629.1.S1_at	ubiquinol cytochrome c reductase	XP_002332696	49.3248	133.781	2.71226	0.010146	1	C:mitochondrion
Cit.16617.1.S1_at	flavonol synthase	Q9ZWQ9	61.0839	165.303	2.70616	0.00121751	8	C:cytoplasm; F:naringenin 3-dioxygenase activity; P:flavonoid biosynthetic process; F:flavonol synthase activity; F:L-ascorbic acid binding; F:iron ion binding; P:oxidation reduction; F:oxidoreductase activity, acting on single donors with incorporation o
Cit.3849.1.S1_at	protein	XP_002264489	193.477	522.262	2.69935	0.00425374	2	C:endomembrane system; C:plastid
Cit.21717.1.S1_at	wound-induced protein win2	XP_002319077	32.8502	88.2558	2.68663	0.0192985	6	P:defense response to bacterium; F:chitinase activity; P:chitin catabolic process; P:cell wall macromolecule catabolic process; P:defense response to fungus; F:chitin binding
Cit.28472.1.S1_at	protein	XP_002320004	33.6261	90.2785	2.68478	0.000214412	4	P:response to hormone stimulus; C:integral to membrane; F:receptor activity; P:response to sucrose stimulus
Cit.14913.1.S1_at	protein	XP_002276365	16.8693	45.2633	2.68317	0.0350834	8	F:chitinase activity; C:vacuole; P:chitin catabolic process; F:cation binding; C:cell wall; F:lysozyme activity; C:extracellular region; P:polysaccharide catabolic process
Cit.39619.1.S1_s_at	protein	XP_002514817	1007.04	2700.11	2.68117	0.0082902	5	P:protein folding; C:cytoplasmic membrane-bounded vesicle; F:calcium ion binding; F:unfolded protein binding; C:endoplasmic reticulum
Cit.17374.1.S1_at	calcium binding protein	ABK06394	273.908	732.762	2.6752	0.0171231	2	P:response to cadmium ion; F:calcium ion binding
Cit.7100.1.S1_x_at	hypothetical protein MtrDRAFT_AC167711g44v2 [Medicago truncatula]	ABN09802	178.951	478.667	2.67485	0.0154907	0
Cit.21529.1.S1_at	cytochrome p450	CBI19823	138.462	370.346	2.6747	0.00124244	4	F:heme binding; P:oxidation reduction; F:electron carrier activity; F:aromatase activity
Cit.26861.1.S1_at	emb2737 (embryo defective 2737)	XP_002285056	62.1219	166.093	2.67367	0.022343	3	F:heat shock protein binding; C:chloroplast; P:embryonic development ending in seed dormancy
Cit.6301.1.S1_at	lactosylceramide 4-alpha-	XP_002531344	14.0161	37.4608	2.6727	0.0439681	2	C:plastid; F:transferase activity, transferring glycosyl groups
Cit.26030.1.S1_at	---NA---		14.3057	38.0789	2.66179	0.0455859	0
Cit.2554.1.S1_s_at	soluble diacylglycerol acyltransferase	XP_002519339	807.322	2146.1	2.65837	0.0114771	5	C:endomembrane system; F:diacylglycerol O-acyltransferase activity; F:acyltransferase activity; F:transferase activity; P:biological_process
Cit.23704.1.S1_at	aspartyl protease family protein	ABK28718	10.3979	27.468	2.64168	0.000826901	6	P:defense response to bacterium; P:regulation of salicylic acid metabolic process; P:regulation of hydrogen peroxide metabolic process; F:aspartic-type endopeptidase activity; P:proteolysis; C:apoplast
Cit.9587.1.S1_x_at	glutathione s-transferase	XP_002273830	244.815	643.198	2.62727	0.0010418	3	P:toxin catabolic process; C:cytoplasm; F:glutathione transferase activity
Cit.2809.1.S1_s_at	ap2 domain-containing transcription factor	XP_002281709	1923.74	5052.21	2.62632	0.0378332	8	P:negative regulation of flower development; P:regulation of transcription, DNA-dependent; P:photoperiodism, flowering; P:response to brassinosteroid stimulus; F:transcription factor activity; P:leaf development; P:lateral root development; C:nucleus
Cit.1005.1.S1_s_at	cytochrome p450	XP_002510500	79.7277	209.139	2.62318	0.0294319	4	F:heme binding; P:oxidation reduction; F:monooxygenase activity; F:electron carrier activity
Cit.4486.1.S1_at	y5175_arath ame: full=upf0706 protein at5g01750	ACU19112	66.2032	173.507	2.62081	0.043455	1	C:chloroplast
Cit.3723.1.S1_at	atp-binding cassette	CBI36229	1236.89	3237.58	2.61762	0.012537	4	C:integral to membrane; F:ATPase activity; F:ATP binding; P:transport
Cit.23149.1.S1_at	---NA---		77.6702	203.161	2.61567	0.0013088	0
Cit.9063.1.S1_at	40s ribosomal protein s9	XP_002511557	116.197	303.546	2.61235	0.00616013	5	F:structural constituent of ribosome; C:cytosolic small ribosomal subunit; C:membrane; P:translation; F:rRNA binding
Cit.26179.1.S1_at	protein	XP_002326560	75.9864	198.241	2.60889	0.00699518	5	F:nucleic acid binding; F:protein kinase activity; P:cellular biopolymer metabolic process; P:primary metabolic process; F:nucleotide binding
Cit.20735.1.S1_at	---NA---		195.646	510.303	2.6083	2.34383e-05	0
Cit.16215.1.S1_at	---NA---		15.8036	41.1868	2.60616	0.0262016	0
Cit.11226.1.S1_at	cytochrome p450	AAL24049	385.629	1004.07	2.60374	0.0475171	5	F:heme binding; P:oxidation reduction; F:monooxygenase activity; F:electron carrier activity; F:oxygen binding
Cit.18260.1.S1_at	receptor serine threonine	XP_002314844	28.6726	74.5952	2.60163	0.0252777	2	F:protein kinase activity; F:nucleotide binding
Cit.6280.1.S1_at	bt4 (btb and taz domain protein 4) protein binding transcription regulator	XP_002304319	120.626	313.791	2.60135	0.0185714	9	F:transcription cofactor activity; P:response to gibberellin stimulus; F:zinc ion binding; P:regulation of transcription, DNA-dependent; P:response to auxin stimulus; P:response to chitin; F:histone acetyltransferase activity; C:cytoplasm; C:nucleus
Cit.4448.1.S1_at	at3g02910-like protein	XP_002325443	97.9878	254.657	2.59887	0.0327234	1	P:biological_process
Cit.12431.1.S1_s_at	phloem protein 2	XP_002523985	191.166	495.548	2.59224	0.0464013	1	F:carbohydrate binding
Cit.6097.1.S1_s_at	phospholipase d	ACA49724	38.7383	100.334	2.59004	0.0107784	5	F:metallocarboxypeptidase activity; F:calcium ion binding; F:phospholipase D activity; C:membrane; P:phosphatidylcholine metabolic process
Cit.352.1.S1_s_at	udp-	ACS87991	74.5073	192.752	2.58703	0.0048372	2	F:indole-3-acetate beta-glucosyltransferase activity; F:abscisic acid glucosyltransferase activity
Cit.10068.1.S1_s_at	#NAME?	XP_002529188	630.682	1628.92	2.5828	0.00451588	4	F:FMN binding; P:metabolic process; F:oxidoreductase activity; F:electron carrier activity
Cit.36265.1.S1_at	huntingtin interacting	XP_002300965	20.1062	51.8118	2.57691	0.00328859	0
Cit.21216.1.S1_at	---NA---		1159.43	2986.62	2.57591	0.00917489	0
Cit.3246.1.S1_at	abc transporter atpase	XP_002523637	346.93	892.687	2.57312	0.0103306	8	P:transport; P:embryonic development ending in seed dormancy; F:ATPase activity, coupled to transmembrane movement of substances; P:iron-sulfur cluster assembly; P:thylakoid membrane organization; F:ATP binding; F:protein binding; C:chloroplast stroma
Cit.12004.1.S1_at	atp-binding cassette	CBI30263	617.143	1587.68	2.57256	0.0183315	4	P:multidrug transport; F:ATPase activity, coupled to transmembrane movement of substances; C:plasma membrane; F:ATP binding
Cit.17260.1.S1_at	af243369_1glutathione s-transferase gst 14	XP_002332749	22.6403	57.8502	2.55518	0.00394843	2	F:transferase activity; F:glutathione transferase activity
Cit.38512.1.S1_at	uridine cytidine kinase	CAO99121	91.4753	233.578	2.55346	0.0326577	3	F:transferase activity, transferring phosphorus-containing groups; P:metabolic process; F:nucleotide binding
Cit.21071.1.S1_x_at	---NA---		105.896	270.394	2.5534	0.00296297	0
Cit.6121.1.S1_at	tir-nbs-lrr resistance protein	XP_002277841	38.267	97.0422	2.53592	0.0203444	7	F:transmembrane receptor activity; F:ATP binding; P:apoptosis; P:signal transduction; F:protein binding; C:intrinsic to membrane; P:innate immune response
Cit.7597.1.S1_at	PREDICTED: hypothetical protein [Vitis vinifera]	XP_002280823	27.8694	70.6374	2.53458	0.0314005	12	C:chromatin; F:RNA-directed DNA polymerase activity; F:DNA binding; P:chromatin assembly or disassembly; F:chromatin binding; P:RNA-dependent DNA replication; F:RNA binding; F:aspartic-type endopeptidase activity; P:proteolysis; C:nucleus; F:zinc ion bind
Cit.3859.1.S1_at	rwp-rk domain-containing protein	ABK96557	90.306	228.4	2.52917	0.000671924	3	C:plastid; F:molecular_function; P:biological_process
Cit.1214.1.S1_at	nuclear transport factor 2	XP_002514900	222.909	563.468	2.52778	5.7159e-05	5	C:cytoplasm; P:protein import into nucleus; F:Ran GTPase binding; C:nuclear envelope; F:protein transporter activity
Cit.12589.1.S1_at	syntaxin	XP_002326741	59.4778	150.179	2.52495	0.00213436	12	P:vesicle-mediated transport; P:cellular morphogenesis during vegetative growth; P:stomatal movement; P:amyloplast organization; C:plant-type vacuole membrane; F:SNAP receptor activity; P:membrane fusion; C:late endosome; P:negative gravitropism; P:vacuol
Cit.32844.1.S1_s_at	glutathione s-	XP_002520166	38.4683	96.9581	2.52047	0.0247455	3	P:toxin catabolic process; C:cytoplasm; F:glutathione transferase activity
Cit.17150.1.S1_at	cytochrome p450	XP_002524034	29.8103	74.9091	2.51285	0.000179441	4	F:heme binding; P:oxidation reduction; F:monooxygenase activity; F:electron carrier activity
Cit.5512.1.S1_at	protein	XP_002518400	20.4063	51.2766	2.51279	0.0199619	2	C:mitochondrion; P:biological_process
Cit.23456.1.S1_at	cral trio domain containing expressed	XP_002517149	80.2094	200.879	2.50442	0.0276099	2	F:molecular_function; P:biological_process
Cit.26238.1.S1_x_at	---NA---		63.8578	159.886	2.50379	0.0083035	0
Cit.27505.1.S1_at	protein	XP_002527558	25.6908	64.1559	2.49723	0.0434305	2	F:protein kinase activity; F:nucleotide binding
Cit.22272.1.S1_s_at	protein	CBI21303	15.1831	37.9146	2.49716	0.00250163	2	C:plastoglobule; F:catalytic activity
Cit.31254.1.S1_at	atp-binding cassette	CAN77838	29.5851	73.2481	2.47584	0.0305192	4	P:multidrug transport; F:ATPase activity, coupled to transmembrane movement of substances; C:plasma membrane; F:nucleotide binding
Cit.30421.1.S1_x_at	cysteine proteinase inhibitor	AAG38521	10.7346	26.5323	2.47166	0.0159685	3	F:cysteine-type endopeptidase inhibitor activity; C:intracellular; C:cell wall
Cit.6621.1.S1_at	zinc finger	XP_002314304	240.483	592.282	2.46288	0.0351428	3	C:mitochondrion; F:zinc ion binding; F:protein binding
Cit.21465.1.S1_at	---NA---		61.76	151.948	2.46028	0.00677527	0
Cit.13892.1.S1_at	conserved hypothetical protein [Ricinus communis]	XP_002514895	90.9688	223.486	2.45673	0.0106335	1	P:biological_process
Cit.6096.1.S1_at	af385724_1 at1g13990	XP_002315031	218.67	536.971	2.45562	0.00451743	1	C:chloroplast
Cit.12560.1.S1_s_at	erd15 protein	XP_002268033	842.265	2063.67	2.45013	0.000356552	5	P:response to high light intensity; P:response to water deprivation; C:cytoplasm; P:response to bacterium; F:protein binding
Cit.4448.1.S1_x_at	at3g02910-like protein	XP_002325443	218.464	534.887	2.44839	0.0112044	1	P:biological_process
Cit.3626.1.S1_at	at3g13050 mgh6_16	XP_002273636	86.1781	210.882	2.44704	0.008569	3	C:membrane; F:sugar:hydrogen symporter activity; P:transport
Cit.16192.1.S1_at	predicted protein [Populus trichocarpa]	XP_002320520	514.241	1256.77	2.44387	0.0393267	2	C:endomembrane system; P:biological_process
Cit.21208.1.S1_s_at	---NA---		116.154	283.462	2.44038	0.000313382	0
Cit.38633.1.S1_at	transparent testa 12	XP_002314825	54.6269	133.288	2.43996	0.0244853	5	F:antiporter activity; F:drug transporter activity; P:multidrug transport; C:chloroplast; C:plasma membrane
Cit.24178.1.S1_at	sec12-like protein 1	CBI40184	69.6383	169.763	2.43778	0.00534108	6	P:phosphate transport; P:cellular response to phosphate starvation; P:ER to Golgi vesicle-mediated transport; C:endoplasmic reticulum; C:mitochondrion; F:nucleotide binding
Cit.23471.1.S1_s_at	40s ribosomal protein s9	BAH95369	241.261	587.909	2.43681	0.00109273	7	F:structural constituent of ribosome; C:cytoplasmic membrane-bounded vesicle; C:cytosolic small ribosomal subunit; C:membrane; P:translation; F:rRNA binding; C:mitochondrion
Cit.4474.1.S1_s_at	integral membrane family protein	XP_002516872	19.1089	46.5187	2.4344	0.00928869	1	C:membrane
Cit.5492.1.S1_at	---NA---		58.3674	141.684	2.42745	0.00353307	0
Cit.14363.1.S1_at	nitrate and chloride transporter	CBI31406	250.686	607.609	2.42378	0.018787	2	F:molecular_function; P:biological_process
Cit.22984.1.S1_x_at	protein	XP_002530074	32.708	79.1628	2.4203	0.0119814	5	F:oxidoreductase activity, acting on paired donors, with incorporation or reduction of molecular oxygen; F:oxidoreductase activity; P:carotenoid biosynthetic process; P:metabolic process; F:monooxygenase activity
Cit.1001.1.S1_s_at	cytochrome p450	XP_002278300	318.438	766.765	2.40789	0.0115347	4	F:heme binding; P:oxidation reduction; F:monooxygenase activity; F:electron carrier activity
Cit.104.1.S1_x_at	---NA---		30.5087	73.1685	2.39827	0.0146006	0
Cit.10672.1.S1_s_at	light-regulated protein	AAP23943	1580.43	3786.9	2.39613	0.00591232	2	F:molecular_function; P:biological_process
Cit.3550.1.S1_at	ankyrin repeat-containing	XP_002526791	430.972	1028.41	2.38623	0.012838	4	P:response to salt stress; F:protein binding; C:plastid; C:plasma membrane
Cit.6767.1.S1_at	leucine-rich repeat containing	XP_002518711	50.3818	119.625	2.37438	0.00630982	7	F:transmembrane receptor activity; F:ATP binding; P:apoptosis; P:signal transduction; F:protein binding; C:intrinsic to membrane; P:innate immune response
Cit.12749.1.S1_at	cxe carboxylesterase	ABB89008	12.1179	28.706	2.3689	0.0400321	3	P:metabolic process; F:hydrolase activity; F:carboxylesterase activity
Cit.7648.1.S1_at	protein	XP_002311057	74.2907	175.903	2.36778	0.0208015	6	F:GTP binding; F:GTP-dependent protein binding; C:peroxisome; C:plasma membrane; P:small GTPase mediated signal transduction; P:protein transport
Cit.30777.1.S1_at	PREDICTED: hypothetical protein [Vitis vinifera]	XP_002283853	324.557	768.1	2.36662	0.00894237	1	C:endomembrane system
Cit.23485.1.S1_at	protein	XP_002280747	24.6549	58.3172	2.36535	0.0126019	3	P:protein amino acid phosphorylation; F:ATP binding; F:protein serine/threonine kinase activity
Cit.28259.1.S1_x_at	bed finger-nbs-lrr resistance protein	CAN63327	217.48	514.038	2.36361	0.0195366	5	F:ATP binding; P:apoptosis; F:nucleotide binding; F:nucleoside-triphosphatase activity; F:protein binding
Cit.18424.1.S1_at	---NA---		80.8183	190.947	2.36267	0.000739836	0
Cit.20196.1.S1_x_at	---NA---		134.182	316.201	2.3565	0.0222041	0
Cit.11337.1.S1_s_at	early response to dehydration 15-like protein	CBI25409	1080.21	2544.74	2.35591	0.000622816	0
Cit.5973.1.S1_s_at	---NA---		33.8722	79.6902	2.35267	0.0234014	0
Cit.7790.1.S1_at	protein	XP_002324850	9.84472	23.1114	2.34759	0.00176133	0
Cit.15603.1.S1_at	protein	XP_002315348	775.375	1814.55	2.34016	0.00169594	3	C:intrinsic to endoplasmic reticulum membrane; F:transferase activity, transferring hexosyl groups; C:mitochondrion
Cit.11303.1.S1_s_at	pleckstrin homology domain-containing protein 1	XP_002269271	798.523	1867.25	2.33842	0.000122766	2	F:phosphoinositide binding; P:signal transduction
Cit.3566.1.S1_at	protein	XP_002533392	858.004	2005.44	2.33727	0.0496779	2	F:electron carrier activity; C:chloroplast
Cit.13601.1.S1_s_at	zinc finger (c3hc4-type ring finger) family protein	XP_002315052	147.16	342.932	2.33034	0.00514676	1	F:zinc ion binding
Cit.28117.1.S1_at	aspartyl protease family protein	ABK28718	62.8343	146.318	2.32863	0.0211277	5	P:defense response to bacterium; P:regulation of salicylic acid metabolic process; P:regulation of hydrogen peroxide metabolic process; F:aspartic-type endopeptidase activity; C:apoplast
Cit.9584.1.S1_s_at	glutathione s-transferase	XP_002273830	460.568	1072.31	2.32824	0.0107527	3	P:toxin catabolic process; C:cytoplasm; F:glutathione transferase activity
Cit.4507.1.S1_at	protein	XP_002307156	509.935	1185.52	2.32485	0.000698049	3	P:protein folding; C:prefoldin complex; F:unfolded protein binding
Cit.10669.1.S1_s_at	---NA---		1674.02	3891.2	2.32444	0.0103918	0
Cit.13439.1.S1_at	dna binding	XP_002512121	252.847	587.693	2.32431	0.0102557	5	F:DNA binding; C:cytoplasmic membrane-bounded vesicle; F:nuclease activity; P:nucleotide-excision repair; C:chloroplast
Cit.9086.1.S1_at	cytochrome p450	XP_002299579	133.998	311.347	2.32352	0.0182085	2	F:monooxygenase activity; F:iron ion binding
Cit.4722.1.S1_s_at	protein	XP_002514817	1802.02	4181.2	2.32021	0.0190366	5	P:protein folding; C:cytoplasmic membrane-bounded vesicle; F:calcium ion binding; F:unfolded protein binding; C:endoplasmic reticulum
Cit.20744.1.S1_x_at	---NA---		19.8734	46.0778	2.31856	0.0286054	0
Cit.30233.1.S1_at	retrotransposon unclassified	XP_002446679	30.0093	69.271	2.30831	0.00755468	6	F:RNA binding; C:mitochondrion; C:cytoplasmic membrane-bounded vesicle; P:RNA-dependent DNA replication; C:membrane; F:RNA-directed DNA polymerase activity
Cit.7458.1.S1_at	PREDICTED: hypothetical protein [Vitis vinifera]	XP_002277682	17.2298	39.7703	2.30823	0.00530564	0
Cit.12978.1.S1_at	---NA---		20.6603	47.6674	2.30719	0.00323293	0
Cit.39092.1.S1_at	nac domain ipr003441	XP_002300866	16.6703	38.4617	2.30719	0.0193315	3	P:regulation of transcription; P:multicellular organismal development; F:transcription factor activity
Cit.21553.1.S1_at	at5g17280 mkp11_13	ABK92656	145.411	334.943	2.30341	0.0280069	1	C:plastid
Cit.28259.1.S1_at	bed finger-nbs-lrr resistance protein	CAN63327	220.591	507.013	2.29844	0.0154738	5	F:ATP binding; P:apoptosis; F:nucleotide binding; F:nucleoside-triphosphatase activity; F:protein binding
Cit.15887.1.S1_at	protein	XP_002529226	147.649	338.936	2.29555	0.0095254	3	F:kinase activity; F:molecular_function; P:biological_process
Cit.2458.1.S1_s_at	cytochrome p450	BAF98466	433.392	994.412	2.29448	0.020798	4	F:heme binding; P:oxidation reduction; F:monooxygenase activity; F:electron carrier activity
Cit.5298.1.S1_at	phenazine biosynthesis	XP_002520768	72.4794	165.809	2.28766	0.00612669	3	C:endomembrane system; P:biosynthetic process; F:catalytic activity
Cit.38329.1.S1_at	cytochrome p450	XP_002510136	28.7532	65.6594	2.28355	0.0213607	2	F:oxidoreductase activity; F:iron ion binding
Cit.10308.1.S1_s_at	membrane protein	ACU16547	434.042	990.841	2.28282	7.0854e-05	1	C:integral to membrane
Cit.12819.1.S1_at	delta-8 sphingolipid desaturase	XP_002302613	132.53	302.28	2.28084	0.0275791	5	F:heme binding; P:fatty acid biosynthetic process; P:oxidation reduction; F:sphingolipid delta-4 desaturase activity; F:oxidoreductase activity, acting on paired donors, with oxidation of a pair of donors resulting in the reduction of molecular oxygen to
Cit.15449.1.S1_at	transitional endoplasmic reticulum	XP_002531022	108.623	247.726	2.2806	9.82145e-06	4	F:serine-type endopeptidase activity; F:ATP binding; P:proteolysis; F:ATP-dependent peptidase activity
Cit.6723.1.S1_at	---NA---		14.6075	33.2154	2.27386	0.0147011	0
Cit.13963.1.S1_s_at	f-box and wd40 domain	CAN76269	513.4	1165.39	2.26994	0.00925003	2	C:plasma membrane; F:nucleotide binding
Cit.31932.1.S1_at	rubisco subunit binding-protein beta	XP_002514548	88.6501	200.372	2.26026	0.00431541	11	P:chaperone mediated protein folding requiring cofactor; P:cell death; P:response to cold; C:chloroplast envelope; P:systemic acquired resistance; F:ATP binding; C:chloroplast stroma; F:unfolded protein binding; C:cytosolic ribosome; C:plasma membrane; C:
Cit.10391.1.S1_s_at	nucleic acid binding	CBI27136	619.526	1399.99	2.25977	0.00754228	7	C:nucleolus; P:endonucleolytic cleavages during rRNA processing; P:cotyledon vascular tissue pattern formation; F:nucleic acid binding; P:leaf vascular tissue pattern formation; P:root development; P:leaf development
Cit.4224.1.S1_at	predicted protein [Populus trichocarpa]	XP_002312395	101.133	228.399	2.25839	0.0427429	0
Cit.16583.1.S1_at	protein	XP_002266288	135.797	306.45	2.25667	0.0320097	1	F:methyltransferase activity
Cit.4131.1.S1_at	pyridoxal kinase	CBI33550	200.342	451.841	2.25534	0.000836953	5	P:hyperosmotic salinity response; P:pyridoxal 5'-phosphate salvage; P:trichoblast differentiation; F:pyridoxal kinase activity; P:pyridoxine biosynthetic process
Cit.34910.1.S1_at	---NA---		32.8047	73.8819	2.25218	0.00139666	0
Cit.38971.1.S1_s_at	---NA---		37.2599	83.8989	2.25171	0.0228293	0
Cit.4661.1.S1_s_at	protein	XP_002325454	642.018	1444.85	2.25043	0.00179478	1	F:acyltransferase activity
Cit.9887.1.S1_at	superoxide dismutase	XP_002280527	137.421	309.207	2.25006	0.00342705	5	F:manganese ion binding; P:removal of superoxide radicals; C:mitochondrial matrix; F:superoxide dismutase activity; P:oxidation reduction
Cit.10366.1.S1_s_at	heat shock protein binding	XP_002330242	396.996	892.73	2.24872	0.0029476	1	P:protein folding
Cit.17431.1.S1_at	---NA---		339.809	763.36	2.24644	0.0064122	0
Cit.29822.1.S1_at	sugar	BAC43633	26.6204	59.7588	2.24485	0.04876	6	C:cytoplasmic membrane-bounded vesicle; C:plasma membrane; P:transmembrane transport; F:sugar:hydrogen symporter activity; P:carbohydrate transport; C:integral to membrane
Cit.9392.1.S1_at	udp-	ACS87993	125.242	280.538	2.23997	0.00522455	1	F:transferase activity, transferring glycosyl groups
Cit.22035.1.S1_a_at	---NA---		8.80626	19.6889	2.23578	0.00013919	0
Cit.38869.1.S1_at	protein	XP_002312032	25.7947	57.6493	2.23493	0.00554668	1	P:floral meristem determinacy
Cit.30091.1.S1_at	aminophospholipid atpase	XP_002514445	177.652	396.633	2.23264	7.37598e-05	3	F:ATPase activity, coupled to transmembrane movement of ions, phosphorylative mechanism; C:cytoplasmic membrane-bounded vesicle; C:plasma membrane
Cit.7994.1.S1_at	protein	XP_002511077	63.2292	140.844	2.22751	0.0131559	1	P:response to stress
Cit.12100.1.S1_at	pyridoxal-phosphate dependent -like enzyme	XP_002329254	46.1817	102.725	2.22438	0.0419691	4	F:tryptophan synthase activity; F:pyridoxal phosphate binding; P:tryptophan biosynthetic process; C:plastid
Cit.17368.1.S1_at	---NA---		59.5174	132.338	2.22351	0.0166472	0
Cit.14573.1.S1_at	copper transporter	XP_002280121	329.524	731.468	2.21977	0.000305819	6	C:vacuole; P:root development; F:high affinity copper ion transmembrane transporter activity; C:membrane; P:pollen sperm cell differentiation; P:high-affinity copper ion transport
Cit.16087.1.S1_at	protein	CBI20423	70.0727	155.417	2.21795	0.00164912	5	F:nucleic acid binding; F:protein kinase activity; P:cellular biopolymer metabolic process; P:primary metabolic process; F:nucleotide binding
Cit.22359.1.S1_at	---NA---		113.324	250.999	2.21489	0.0181573	0
Cit.5117.1.S1_at	universal stress protein	XP_002515296	2194.84	4857.17	2.2129	0.00641416	2	P:response to stress; C:vacuole
Cit.4146.1.S1_at	serine palmitoyltransferase	CBI15735	70.7839	156.625	2.21272	0.0283889	9	P:pollen development; F:pyridoxal phosphate binding; P:sphingosine biosynthetic process; F:protein binding; F:serine C-palmitoyltransferase activity; F:transferase activity, transferring nitrogenous groups; P:photomorphogenesis; C:membrane; C:endoplasmic
Cit.27795.1.S1_at	---NA---		77.3538	170.943	2.20988	0.00135157	0
Cit.29898.1.S1_at	protein	CBI21863	1169.52	2581.87	2.20763	0.0190645	3	F:transcription regulator activity; P:regulation of transcription; C:nucleus
Cit.10854.1.S1_s_at	protein	XP_002514963	454.331	1001.99	2.20543	0.00843732	9	P:oxylipin biosynthetic process; P:response to wounding; P:defense response; F:electron carrier activity; F:iron ion binding; P:oxidation reduction; P:growth; C:chloroplast; F:lipoxygenase activity
Cit.16221.1.S1_x_at	protein	XP_002531443	17.0782	37.637	2.2038	0.0334973	0
Cit.20003.1.S1_s_at	cytochrome b561	XP_002322468	433.501	953.613	2.1998	0.0251763	4	F:carbon-monoxide oxygenase activity; C:cytoplasmic membrane-bounded vesicle; C:integral to membrane; C:chloroplast
Cit.16727.1.S1_at	udp-	ABN58740	224.422	493.306	2.19812	0.0125583	2	F:transferase activity, transferring hexosyl groups; P:metabolic process
Cit.19924.1.S1_s_at	---NA---		1460.86	3198.77	2.18976	0.0165235	0
Cit.10673.1.S1_at	light-regulated protein	AAP23943	5790.61	12673.3	2.18858	0.00176401	2	F:molecular_function; P:biological_process
Cit.20697.1.S1_at	---NA---		97.5703	213.146	2.18453	0.00790506	0
Cit.20153.1.S1_x_at	---NA---		805.237	1757.37	2.18239	0.00118272	0
Cit.19831.1.S1_at	---NA---		56.2016	122.611	2.18161	0.012848	0
Cit.18537.1.S1_at	mee14 (maternal effect embryo arrest 14)	XP_002519150	10.0567	21.9219	2.17981	0.00440402	1	P:embryonic development ending in seed dormancy
Cit.21798.1.S1_at	glucosyl transferase	ACS87992	155.579	338.361	2.17486	0.00764502	5	F:cis-zeatin O-beta-D-glucosyltransferase activity; P:brassinosteroid metabolic process; P:response to UV-B; F:trans-zeatin O-beta-D-glucosyltransferase activity; P:flavonol biosynthetic process
Cit.465.1.S1_s_at	thiamin biosynthetic enzyme	XP_002305603	3027.48	6581.5	2.17393	0.0109286	10	P:response to cold; P:oxazole or thiazole biosynthetic process; F:electron carrier activity; C:chloroplast stroma; P:response to DNA damage stimulus; C:thylakoid; C:membrane; C:mitochondrion; F:protein homodimerization activity; P:thiamin biosynthetic pro
Cit.30001.1.S1_at	---NA---		35.841	77.8497	2.17208	0.0243456	0
Cit.18360.1.S1_s_at	---NA---		16.7907	36.4622	2.17158	0.00476559	0
Cit.1610.1.S1_at	peptidyl-prolyl cis-trans isomerase-like protein	XP_002271056	543.26	1179.12	2.17052	0.00753587	8	P:protein folding; C:endoplasmic reticulum lumen; C:chloroplast thylakoid lumen; F:FK506 binding; C:cytoplasmic membrane-bounded vesicle; P:response to stress; C:endoplasmic reticulum; F:peptidyl-prolyl cis-trans isomerase activity
Cit.11040.1.S1_at	hydroxyacylglutathione hydrolase	XP_002329233	154.932	335.768	2.1672	0.00185044	4	C:cytoplasm; P:methylglyoxal catabolic process to D-lactate; F:hydroxyacylglutathione hydrolase activity; F:zinc ion binding
Cit.18262.1.S1_at	zinc finger (b-box type) family protein	CBI38177	110.387	239.206	2.16696	0.0172672	4	P:regulation of transcription; F:zinc ion binding; F:transcription factor activity; C:intracellular
Cit.27815.1.S1_x_at	---NA---		541.906	1173.25	2.16508	0.000118895	0
Cit.33912.1.S1_at	mov34 mpn pad-1 family protein	XP_002315693	161.085	348.668	2.16451	8.72654e-06	3	P:ubiquitin-dependent protein catabolic process; C:chloroplast; C:mitochondrion
Cit.25338.1.S1_x_at	glycine-rich rna-binding protein	BAA92156	28.8068	62.2853	2.16217	0.0400151	3	C:nucleus; F:nucleotide binding; F:RNA binding
Cit.17781.1.S1_at	ubiquinol-cytochrome c reductase complex ubiquinone-binding protein qp-c	XP_002319981	1169.44	2525.58	2.15968	0.012246	5	P:transport; P:electron transport chain; C:mitochondrial respiratory chain complex III; P:regulation of transcription, DNA-dependent; F:DNA binding
Cit.22360.1.S1_at	---NA---		232.634	502.089	2.15828	0.0186844	0
Cit.2776.1.S1_at	vacuolar atpase subunit h protein	XP_002319248	294.801	636.034	2.1575	0.0154983	8	C:vacuolar proton-transporting V-type ATPase, V1 domain; C:plant-type vacuole; P:ATP synthesis coupled proton transport; F:ATP binding; F:proton-transporting ATPase activity, rotational mechanism; F:heme binding; C:chloroplast; C:plasma membrane
Cit.2333.1.S1_at	nadph oxidase	XP_002511059	80.0495	172.57	2.15579	0.00534977	14	P:defense response; F:NAD(P)H oxidase activity; P:root epidermal cell differentiation; P:oxygen and reactive oxygen species metabolic process; F:calcium ion binding; P:oxidation reduction; F:peroxidase activity; P:response to heat; F:electron carrier acti
Cit.17325.1.S1_at	blight-associated protein p12 precursor	XP_002309373	429.564	925.86	2.15535	0.00308184	1	C:cytoplasmic membrane-bounded vesicle
Cit.12594.1.S1_at	conserved hypothetical protein [Ricinus communis]	XP_002535277	30.651	66.0602	2.15523	0.00220412	0
Cit.10722.1.S1_s_at	6-phosphogluconolactonase family expressed	XP_002512062	543.818	1171.39	2.15399	0.00912537	3	P:pentose-phosphate shunt; C:plastid; F:6-phosphogluconolactonase activity
Cit.13055.1.S1_at	pyruvate kinase	NP_001065749	55.8788	120.041	2.14823	0.00200795	6	F:pyruvate kinase activity; P:response to cadmium ion; C:plasma membrane; F:potassium ion binding; F:magnesium ion binding; P:glycolysis
Cit.254.1.S1_x_at	polyubiquitin	ABY60454	44.1166	94.6611	2.14572	0.000333004	3	C:cytoplasmic membrane-bounded vesicle; C:nucleus; P:protein modification process
Cit.5086.1.S1_at	at1g27030 t7n9_9	CBI32019	245.568	526.825	2.14532	0.0303826	2	C:mitochondrion; C:chloroplast
Cit.3005.1.S1_at	flc-like 1 splice variant 4	ACB72865	121.281	259.853	2.14257	0.00225841	4	F:sequence-specific DNA binding; F:transcription factor activity; C:nucleus; P:regulation of transcription, DNA-dependent
Cit.9321.1.S1_at	---NA---		59.2614	126.803	2.13973	0.0164509	0
Cit.8950.1.S1_at	ap2 erf domain-containing transcription factor	ABB89755	336.833	718.966	2.13449	0.0111403	3	F:transcription factor activity; C:nucleus; P:regulation of transcription, DNA-dependent
Cit.31301.1.S1_at	protein	XP_002519837	209.062	446.049	2.13358	0.00497616	2	F:protein binding; C:plasma membrane
Cit.29440.1.S1_at	---NA---		241.159	514.419	2.13311	0.0112765	0
Cit.1253.1.S1_at	---NA---		285.392	608.283	2.1314	0.0178194	0
Cit.14100.1.S1_at	grp23 (glutamine-rich protein23) binding	XP_002600635	85.8169	182.836	2.13053	0.00818064	7	P:response to salicylic acid stimulus; P:response to abscisic acid stimulus; C:keratin filament; P:cell division; F:protein binding; C:nucleus; P:embryonic development
Cit.20607.1.S1_at	---NA---		124.147	264.497	2.13052	0.00632788	0
Cit.21282.1.S1_at	---NA---		206.127	438.767	2.12862	0.00502637	0
Cit.17910.1.S1_s_at	protein n-terminal asparagine amidohydrolase	CBI32171	209.996	446.764	2.12749	0.00169905	7	F:protein N-terminal asparagine amidohydrolase activity; P:memory; C:cytoplasm; P:adult locomotory behavior; F:hydrolase activity; P:biological_process; C:nucleus
Cit.5255.1.S1_at	protein	XP_002279792	19.6371	41.7305	2.12507	0.00143509	2	F:nucleic acid binding; F:nucleotide binding
Cit.26662.1.S1_at	protein	CBI21303	64.7995	137.65	2.12424	0.000297	2	C:plastoglobule; F:catalytic activity
Cit.18696.1.S1_at	---NA---		185.233	393.279	2.12316	0.0312345	0
Cit.13677.1.S1_at	vtc2-like protein	CBI31025	647.775	1374.6	2.12202	0.00202113	0
Cit.9944.1.S1_at	cinnamyl alcohol dehydrogenase-like protein	XP_002534367	78.0881	165.669	2.12157	0.0369669	3	F:zinc ion binding; P:oxidation reduction; F:mannitol dehydrogenase activity
Cit.28338.1.S1_at	fibrillarin 2	XP_002513667	608.199	1289.68	2.1205	0.000257927	6	C:nucleolus; F:snoRNA binding; F:protein binding; P:RNA methylation; P:rRNA processing; C:membrane
Cit.12654.1.S1_x_at	---NA---		78.5021	166.077	2.11557	0.0390229	0
Cit.17768.1.S1_s_at	dormancy auxin associated family protein	ACU14512	78.7239	166.214	2.11135	0.00463311	1	F:molecular_function
Cit.26113.1.S1_at	phototropic-responsive nph3 family protein	CAN63893	1338.22	2825.32	2.11134	0.00256909	3	F:protein binding; P:response to light stimulus; F:signal transducer activity
Cit.30576.1.S1_at	guanylyl cyclase	XP_002277052	75.9064	160.255	2.11123	0.00522873	5	P:response to high light intensity; P:response to chitin; P:response to hydrogen peroxide; F:transcription factor activity; P:response to heat
Cit.30920.1.S1_s_at	copper transporter	XP_002280121	618.637	1304.52	2.10866	0.000888292	6	C:vacuole; P:root development; F:high affinity copper ion transmembrane transporter activity; C:membrane; P:pollen sperm cell differentiation; P:high-affinity copper ion transport
Cit.14333.1.S1_at	at3g52230 f4f15_340	XP_002315353	205.605	433.446	2.10815	0.0038183	2	C:chloroplast outer membrane; C:chloroplast thylakoid membrane
Cit.18165.1.S1_at	---NA---		340.665	717.836	2.10716	0.0159885	0
Cit.14279.1.S1_at	protein	XP_002314048	129.698	273.247	2.10679	0.0290458	1	C:vacuole
Cit.18516.1.S1_at	zinc finger protein glo3-like	XP_002527677	38.2774	80.5236	2.10367	0.0190262	6	F:DNA binding; P:regulation of ARF GTPase activity; P:embryonic development ending in seed dormancy; F:ARF GTPase activator activity; C:nucleus; F:zinc ion binding
Cit.5285.1.S1_s_at	mitochondrial import inner membrane translocase subunit	XP_002319066	27.9943	58.8618	2.10264	0.00183331	3	F:P-P-bond-hydrolysis-driven protein transmembrane transporter activity; P:protein targeting to mitochondrion; C:mitochondrial inner membrane presequence translocase complex
Cit.7900.1.S1_at	serine-threonine protein plant-	XP_002532098	49.2974	103.559	2.10071	0.00913723	1	F:kinase activity
Cit.25177.1.S1_s_at	protein	XP_002302161	76.6583	160.858	2.09838	0.0496662	2	F:molecular_function; P:biological_process
Cit.13644.1.S1_x_at	protein	XP_002330910	112.889	236.834	2.09794	0.0318877	0
Cit.28300.1.S1_at	protein	CBI20414	324.175	680.075	2.09787	0.00104429	5	F:nucleic acid binding; F:protein kinase activity; P:cellular biopolymer metabolic process; P:primary metabolic process; F:nucleotide binding
Cit.16303.1.S1_at	protein	XP_002305196	46.6278	97.6921	2.09514	0.0163474	5	F:geranyltranstransferase activity; P:carotenoid biosynthetic process; F:farnesyltranstransferase activity; F:dimethylallyltranstransferase activity; C:chloroplast
Cit.3246.1.S1_s_at	abc transporter atpase	XP_002523637	875.492	1833.27	2.09405	0.0299227	8	P:transport; P:embryonic development ending in seed dormancy; F:ATPase activity, coupled to transmembrane movement of substances; P:iron-sulfur cluster assembly; P:thylakoid membrane organization; F:ATP binding; F:protein binding; C:chloroplast stroma
Cit.836.1.S1_s_at	protein	XP_002520818	1864.28	3901.73	2.09287	0.0212474	3	P:response to fungus; P:response to stress; P:aging
Cit.11810.1.S1_at	rna recognition motif -containing protein	XP_002513193	2005.85	4198.04	2.09286	0.00140196	6	C:ribosome; C:chloroplast envelope; F:RNA binding; C:chloroplast stroma; C:chloroplast thylakoid membrane; F:nucleotide binding
Cit.14441.1.S1_at	protein	XP_002267401	346.98	725.917	2.09209	0.000613078	5	F:protein transmembrane transporter activity; P:intracellular protein transport; C:integral to membrane; C:endoplasmic reticulum; C:mitochondrion
Cit.2066.1.S1_at	rszp22 splicing factor	XP_002325387	133.805	279.674	2.09016	0.00290405	7	C:nucleolus; F:nucleic acid binding; F:protein binding; C:nuclear speck; F:zinc ion binding; P:nuclear mRNA splicing, via spliceosome; F:nucleotide binding
Cit.109.1.S1_x_at	glycine-rich protein	BAA92155	3025.38	6323.03	2.08997	0.00188874	0
Cit.28233.1.S1_at	predicted protein [Populus trichocarpa]	XP_002330243	41.7157	87.1718	2.08965	0.02501	0
Cit.14371.1.S1_at	homogentisic acid geranylgeranyl transferase	BAH10642	12.9017	26.9589	2.08956	0.0285068	9	P:vitamin E biosynthetic process; P:phloem loading; F:homogentisate phytyltransferase activity; P:regulation of defense response; P:cell wall organization; P:unsaturated fatty acid biosynthetic process; C:chloroplast; C:membrane; P:response to temperature
Cit.23824.1.S1_at	protein	XP_002263043	63.5896	132.784	2.08815	0.00520563	5	C:plasma membrane; F:urea transmembrane transporter activity; C:integral to membrane; P:sodium ion transport; P:cellular response to nitrogen starvation
Cit.12388.1.S1_at	protein	XP_002534435	23.9156	49.9291	2.08773	0.0331954	4	F:molecular_function; C:membrane; F:catalytic activity; P:biological_process
Cit.14366.1.S1_at	bsd domain-containing protein	XP_002316003	132.164	275.208	2.08232	0.00723222	1	C:chromosome
Cit.6636.1.S1_at	lipoxygenase	XP_002311617	97.0018	201.633	2.07866	0.0255766	5	F:lipoxygenase activity; P:oxidation reduction; F:iron ion binding; F:electron carrier activity; P:oxylipin biosynthetic process
Cit.10367.1.S1_s_at	heat shock protein binding	XP_002330242	243.107	504.734	2.07618	0.000271037	2	P:protein folding; F:heat shock protein binding
Cit.37711.1.S1_at	hypothetical protein [Vitis vinifera]	CAN73940	42.3676	87.8762	2.07412	0.0304646	0
Cit.3947.1.S1_at	amidohydrolase family protein	XP_002514870	505.985	1049.07	2.07339	0.00912805	1	F:hydrolase activity, acting on carbon-nitrogen (but not peptide) bonds
Cit.32832.1.S1_at	protein	XP_002269885	63.764	132.144	2.07239	0.0109421	6	C:endomembrane system; P:response to cadmium ion; C:cytoplasmic membrane-bounded vesicle; P:embryonic development ending in seed dormancy; F:CTP synthase activity; P:pyrimidine nucleotide biosynthetic process
Cit.35354.1.S1_s_at	protein	CBI24933	293.029	606.398	2.06941	0.0016174	1	F:heme binding
Cit.9064.1.S1_x_at	40s ribosomal protein s9	XP_002511557	270.089	558.774	2.06885	0.0010949	8	C:nucleolus; F:structural constituent of ribosome; C:plasma membrane; C:cell wall; C:cytosolic small ribosomal subunit; C:chloroplast; P:translation; F:rRNA binding
Cit.6784.1.S1_at	predicted protein [Populus trichocarpa]	XP_002326500	23.8352	49.1763	2.06318	0.0152784	1	F:DNA binding
Cit.18607.1.S1_at	---NA---		463.884	956.692	2.06235	0.00612647	0
Cit.14044.1.S1_at	protein	XP_002514876	133.211	274.5	2.06065	0.00619688	1	F:transcription factor activity
Cit.12786.1.S1_x_at	ring-h2 finger protein	EEE62065	278.194	573.039	2.05986	0.0180602	7	F:metal ion binding; C:mitochondrion; C:membrane; F:zinc ion binding; P:metal ion transport; F:protein binding; F:metal ion transmembrane transporter activity
Cit.5555.1.S1_at	cop9 complex subunit	XP_002302493	59.2873	122.073	2.05901	0.000712981	6	F:MAP kinase kinase activity; F:protein binding; P:photomorphogenesis; C:signalosome; P:signalosome assembly; P:cullin deneddylation
Cit.2165.1.S1_at	zinc finger protein glo3-like	XP_002527677	474.433	976.814	2.0589	0.00614514	6	F:DNA binding; P:regulation of ARF GTPase activity; P:embryonic development ending in seed dormancy; F:ARF GTPase activator activity; C:nucleus; F:zinc ion binding
Cit.642.1.S1_x_at	---NA---		13.1497	27.0669	2.05836	0.0344132	0
Cit.490.1.S1_at	elongation factor 1- expressed	AAC15413	78.0913	160.548	2.0559	0.0200523	5	C:cytoplasm; F:translation elongation factor activity; F:GTP binding; P:translational elongation; F:GTPase activity
Cit.6128.1.S1_at	kelch repeat-containing f-box family protein	CBI31984	60.0649	123.351	2.05363	0.0158684	1	C:peroxisome
Cit.9144.1.S1_at	atp-dependent clp	XP_002511102	275.399	565.499	2.05338	0.00615809	15	C:cell wall; P:nucleotide-excision repair; C:mitochondrion; F:ATP-dependent peptidase activity; F:DNA binding; P:chloroplast organization; P:protein metabolic process; F:ATP binding; C:Tic complex; F:protein binding; C:chloroplast thylakoid membrane; C:ch
Cit.20666.1.S1_at	cytochrome p450	XP_002268477	29.383	60.3248	2.05305	0.0055983	4	F:heme binding; P:oxidation reduction; F:monooxygenase activity; F:electron carrier activity
Cit.18607.1.S1_s_at	---NA---		488.055	1001.73	2.0525	0.00132499	0
Cit.15941.1.S1_at	chromatin remodeling complex subunit	ABA18099	108.375	222.367	2.05183	0.000195653	7	C:mitochondrion; C:nucleolus; P:regulation of transcription, DNA-dependent; P:gene silencing by RNA; F:ATP binding; F:transcription factor activity; F:helicase activity
Cit.7403.1.S1_at	predicted protein [Populus trichocarpa]	XP_002309014	53.7633	110.275	2.05111	0.0421341	0
Cit.29173.1.S1_s_at	---NA---		16.7799	34.3536	2.04731	0.011654	0
Cit.35987.1.S1_at	---NA---		18.2326	37.2327	2.04209	0.00170337	0
Cit.14471.1.S1_at	---NA---		351.551	717.348	2.04052	0.0016059	0
Cit.24527.1.S1_s_at	short chain alcohol dehydrogenase-like	XP_002311182	518.144	1056.3	2.03863	0.000908664	3	F:oxidoreductase activity; P:oxidation reduction; F:binding
Cit.1554.1.S1_at	membrane protein	CBI27668	218.253	444.922	2.03856	0.00688931	1	P:response to oxidative stress
Cit.9932.1.S1_at	60s ribosomal protein l6	XP_002513192	78.1254	159.251	2.03841	0.00182217	7	C:nucleolus; F:structural constituent of ribosome; C:plasma membrane; C:cytosolic large ribosomal subunit; C:chloroplast; P:translation; C:endoplasmic reticulum
Cit.6069.1.S1_at	type 1 kh domain-containing protein	ACU24003	484.405	986.1	2.0357	0.000528324	1	F:RNA binding
Cit.14582.1.S1_at	protein	XP_002525477	203.533	413.823	2.03321	0.00637439	2	C:cytoplasmic membrane-bounded vesicle; C:plastid
Cit.401.1.S1_x_at	copper zinc-superoxide dismutase	AAQ14591	1037.29	2105.14	2.02955	0.0319687	5	F:copper ion binding; P:oxidation reduction; P:superoxide metabolic process; F:superoxide dismutase activity; F:zinc ion binding
Cit.7621.1.S1_at	protein	CBI31435	276.921	561.616	2.02807	0.00442177	1	C:mitochondrion
Cit.20940.1.S1_at	---NA---		195.132	395.551	2.02709	0.0122248	0
Cit.15985.1.S1_at	swi snf family transcription activator	XP_002322279	66.7668	135.188	2.02476	0.00216827	1	P:cellular process
Cit.35569.1.S1_s_at	syntaxin	XP_002326741	140.568	284.316	2.02263	0.00245234	12	P:vesicle-mediated transport; P:cellular morphogenesis during vegetative growth; P:stomatal movement; P:amyloplast organization; C:plant-type vacuole membrane; F:SNAP receptor activity; P:membrane fusion; C:late endosome; P:negative gravitropism; P:vacuol
Cit.19026.1.S1_at	protein	CBI20414	12.2476	24.771	2.02252	0.0101576	3	F:protein kinase activity; F:ATP binding; P:protein amino acid phosphorylation
Cit.6083.1.S1_at	protein	XP_002332644	96.2904	194.375	2.01864	0.00684803	0
Cit.559.1.S1_x_at	predicted protein [Populus trichocarpa]	XP_002311816	22.7455	45.892	2.01762	0.0324021	0
Cit.2495.1.S1_at	rna binding protein rp120	XP_002511064	512.803	1034.13	2.01664	0.0150259	9	F:hydrolase activity, acting on ester bonds; F:nucleic acid binding; P:response to cadmium ion; C:plasma membrane; F:protein binding; C:RNA-induced silencing complex; P:RNA interference; C:cell wall; C:chloroplast
Cit.29414.1.S1_s_at	---NA---		2884.29	5809.1	2.01404	0.00365954	0
Cit.14769.1.S1_at	yth domain-containing	XP_002514907	63.0511	126.97	2.01376	0.000106211	3	F:molecular_function; P:biological_process; C:cellular_component
Cit.27025.1.S1_at	---NA---		19.7655	39.767	2.01194	0.0201737	0
Cit.9936.1.S1_at	ribosomal protein l30	XP_002528991	177.845	357.763	2.01166	0.0073646	3	F:structural constituent of ribosome; C:cytosolic large ribosomal subunit; P:translation
Cit.12031.1.S1_s_at	nhl repeat-containing protein	XP_002265272	388.099	780	2.0098	0.000813664	1	C:cytoplasmic membrane-bounded vesicle
Cit.9064.1.S1_s_at	40s ribosomal protein s9	XP_002511557	4308.29	8656.69	2.00929	0.000461215	8	C:nucleolus; F:structural constituent of ribosome; C:plasma membrane; C:cell wall; C:cytosolic small ribosomal subunit; C:chloroplast; P:translation; F:rRNA binding
Cit.843.1.S1_at	at5g24690 mxc17_8	XP_002303156	59.2293	118.994	2.00903	0.0101545	2	C:mitochondrion; C:chloroplast inner membrane
Cit.32291.1.S1_at	protein	XP_002530865	137.394	275.884	2.00797	0.011199	1	C:plastid
Cit.18892.1.S1_at	protein	XP_002513461	32.975	66.151	2.00609	0.0297703	0
Cit.20689.1.S1_s_at	---NA---		770.745	1545.87	2.00566	0.000659755	0
Cit.9815.1.S1_s_at	at5g18400 f20l16_120	XP_002271546	477.369	957.421	2.00562	0.00749229	2	C:endomembrane system; P:biological_process
Cit.14822.1.S1_at	protein	XP_002312803	162.789	325.926	2.00213	0.0464122	4	P:protein amino acid phosphorylation; F:ATP binding; C:chloroplast; F:protein serine/threonine kinase activity
Cit.35206.1.S1_at	MYB family transcription factor	FR828559	226.664	453.579	2.00112	0.0172141	2	P:regulation of transcription; F:transcription factor activity
Cit.25606.1.S1_at	f-box family protein	XP_002301149	145.698	291.508	2.00076	0.024287	1	P:ubiquitin-dependent protein catabolic process
Cit.6663.1.S1_at	speckle-type poz	XP_002328956	179.065	358.187	2.00031	0.000235492	2	P:biological_process; F:protein binding

## Sheet: Supplemental Table 2
Supplemental Table S2: List of significantly downregulated genes in TG9 as compared with WT. Fold-change = TG9/WT.
Gene ID	Seq. Description	Hit ACC	Expression levels			p-value	#GOs	GOs
			WT	TG9	Fold change
Cit.57.1.S1_at	miraculin-like protein 2	BAE79511	4992.68	53.9189	-92.5932	0.0022152	1	F:endopeptidase inhibitor activity
Cit.57.1.S1_x_at	miraculin-like protein 2	BAE79511	3296.46	48.7402	-67.6315	0.00289285	1	F:endopeptidase inhibitor activity
Cit.25064.1.S1_s_at	miraculin-like protein 2	BAE79511	3230.85	55.8401	-57.8576	0.0031436	1	F:endopeptidase inhibitor activity
Cit.8142.1.S1_at	dna binding protein	ABO93454	352.336	12.1583	-28.9791	0.0381793	0
Cit.30420.1.S1_x_at	dna binding protein	ABO93454	1657.28	58.7041	-28.2315	0.0251114	0
Cit.72.1.S1_s_at	miraculin-like protein 2	AAG38519	2034.14	112.286	-18.1154	0.00874029	1	F:endopeptidase inhibitor activity
Cit.165.1.S1_s_at	early light-inducible protein	ACB20694	233.119	18.5088	-12.595	0.0307696	8	P:regulation of chlorophyll biosynthetic process; P:response to cold; P:response to UV-B; F:chlorophyll binding; C:membrane; P:response to far red light; P:response to red light; C:plastid
Cit.11068.1.S1_at	ap2 erf domain-containing transcription factor	ACL78788	382.554	44.5604	-8.58509	0.00430162	3	F:transcription factor activity; P:seed germination; P:regulation of transcription, DNA-dependent
Cit.4573.1.S1_at	loxc homologue	XP_002513441	129.311	15.2574	-8.47527	0.0121907	5	F:lipoxygenase activity; P:oxidation reduction; F:iron ion binding; F:electron carrier activity; P:oxylipin biosynthetic process
Cit.13366.1.S1_at	chalcone synthase	BAA31259	507.214	67.8501	-7.47552	0.00147525	3	F:acyltransferase activity; F:naringenin-chalcone synthase activity; P:flavonoid biosynthetic process
Cit.30607.1.S1_s_at	ap2 erf domain-containing transcription factor	ACL78788	104.792	14.1091	-7.4273	0.000427562	3	F:transcription factor activity; P:seed germination; P:regulation of transcription, DNA-dependent
Cit.31131.1.S1_at	lipid binding protein	XP_002521893	1262.18	174.532	-7.23167	0.000434317	2	P:lipid transport; C:cytoplasmic membrane-bounded vesicle
Cit.40325.1.S1_s_at	clh1_citun ame: full=chlorophyllase- chloroplastic ame: full=chlorophyll-chlorophyllido hydrolase 1 short=chlase 1 flags: precursor	Q94LX1	1183.71	170.75	-6.93236	0.0289086	4	P:chlorophyll catabolic process; P:response to stress; C:intracellular membrane-bounded organelle; F:chlorophyllase activity
Cit.34812.1.S1_s_at	---NA---		330.643	47.9414	-6.8968	0.00367874	0
Cit.374.1.S1_s_at	alpha-expansin 15	ACK43223	177.767	27.6794	-6.42235	0.0404398	3	C:extracellular region; P:plant-type cell wall organization; C:membrane
Cit.577.1.S1_s_at	kelch repeat-containing f-box family protein	XP_002299632	78.8479	12.6793	-6.21861	0.00833844	4	P:response to biotic stimulus; P:defense response; F:molecular_function; P:biological_process
Cit.10661.1.S1_s_at	soluble acid invertase	BAF34362	263.162	44.1689	-5.9581	0.000915297	4	F:beta-fructofuranosidase activity; P:carbohydrate metabolic process; C:vacuole; C:plant-type cell wall
Cit.8608.1.S1_at	lectin precursor	XP_002282629	8538.7	1461.77	-5.84115	0.0157578	1	F:sugar binding
Cit.20280.1.S1_at	---NA---		65.8189	11.5499	-5.69864	0.0321969	0
Cit.15919.1.S1_at	ptr2 family peptide transporter	XP_002520834	331.141	61.7334	-5.36404	0.00512553	5	C:membrane; C:cytoplasmic membrane-bounded vesicle; P:oligopeptide transport; P:response to nematode; F:transporter activity
Cit.21493.1.S1_at	transferring glycosyl	XP_002526651	269.097	50.9373	-5.2829	0.000113266	5	P:pollen wall assembly; P:1,3-beta-glucan biosynthetic process; F:1,3-beta-glucan synthase activity; P:microsporogenesis; C:1,3-beta-glucan synthase complex
Cit.14898.1.S1_s_at	copper transporter	CBI16033	627.351	123.483	-5.08047	0.00922837	6	C:vacuole; P:root development; F:high affinity copper ion transmembrane transporter activity; C:integral to membrane; P:pollen sperm cell differentiation; P:high-affinity copper ion transport
Cit.29366.1.S1_at	hypothetical protein [Vitis vinifera]	CAN65723	104.454	20.9077	-4.996	0.0171498	1	C:cytoplasmic membrane-bounded vesicle
Cit.31336.1.S1_at	---NA---		69.4879	14.2516	-4.87583	0.000476872	0
Cit.1481.1.S1_x_at	lipid binding	ABK93190	1151.58	236.548	-4.8682	0.0400938	1	C:cytoplasmic membrane-bounded vesicle
Cit.10661.1.S1_at	soluble acid invertase	BAF34362	844.1	177.682	-4.75061	0.000258577	4	F:beta-fructofuranosidase activity; P:carbohydrate metabolic process; C:vacuole; C:plant-type cell wall
Cit.1740.1.S1_s_at	PREDICTED: hypothetical protein [Vitis vinifera]	XP_002274217	4580.22	979.804	-4.67452	0.00612058	1	C:anchored to membrane
Cit.16117.1.S1_x_at	---NA---		54.0237	11.9557	-4.51865	0.0211611	0
Cit.30225.1.S1_at	protein	XP_002309220	209.132	46.4459	-4.5027	0.00483761	3	F:zinc ion binding; P:biological_process; C:intracellular
Cit.35355.1.S1_s_at	mother of ft and tfl1-like protein	XP_002265942	876.755	197.511	-4.43901	0.00404959	1	F:binding
Cit.5438.1.S1_at	predicted protein [Populus trichocarpa]	XP_002309595	170.921	39.1937	-4.36093	0.0104753	2	C:chloroplast; P:biological_process
Cit.11243.1.S1_at	cytochrome p450	ABA01477	39.6761	9.11505	-4.35284	0.0460545	2	F:oxidoreductase activity; F:iron ion binding
Cit.20076.1.S1_x_at	---NA---		155.405	35.9204	-4.32637	0.0477924	0
Cit.40492.1.S1_s_at	udp rhamnose:anthocyanidin-3-glucoside rhamnosyltransferase	ABA18631	148.848	34.7155	-4.28766	0.0363964	2	F:transferase activity, transferring hexosyl groups; P:metabolic process
Cit.8600.1.S1_x_at	chalcone synthase	Q9XJ57	1235.43	290.57	-4.25189	0.00796376	3	F:acyltransferase activity; F:naringenin-chalcone synthase activity; P:flavonoid biosynthetic process
Cit.304.1.S1_s_at	aquaporin	ABK60194	257.072	61.0339	-4.21198	0.00871164	3	P:transport; C:integral to membrane; F:transporter activity
Cit.22030.1.S1_at	transcription factor qsh-1	XP_002272686	103.025	24.99	-4.12263	0.0133932	16	C:cytosol; P:secondary shoot formation; P:maintenance of floral meristem identity; P:vegetative to reproductive phase transition; P:regulation of transcription, DNA-dependent; P:fruit development; P:maintenance of inflorescence meristem identity; P:xylem
Cit.13136.1.S1_s_at	short-chain dehydrogenase tic32	XP_002270104	104.554	25.3735	-4.12062	0.0364353	3	F:oxidoreductase activity; P:oxidation reduction; F:binding
Cit.29369.1.S1_x_at	---NA---		534.305	130.532	-4.09326	0.0249981	0
Cit.8612.1.S1_at	protein	AAG38522	241.473	59.2716	-4.07401	0.0362024	4	C:mitochondrion; C:plastid; F:sugar binding; F:acylphosphatase activity
Cit.30027.1.S1_at	---NA---		1051.18	259.239	-4.05488	0.00222046	0
Cit.20267.1.S1_x_at	lipid binding	ABK93190	244.649	60.6956	-4.03076	0.0228206	1	C:cytoplasmic membrane-bounded vesicle
Cit.31216.1.S1_at	s-adenosyl-l-methionine:salicylic acid carboxyl methyltransferase	XP_002325354	1030.69	262.976	-3.91946	0.0272813	2	P:fatty acid biosynthetic process; F:methyltransferase activity
Cit.19520.1.S1_s_at	chalcone synthase	ACB47461	1596.28	407.267	-3.91938	0.0231356	3	F:acyltransferase activity; F:naringenin-chalcone synthase activity; P:flavonoid biosynthetic process
Cit.2889.1.S1_at	flavanone 3-hydroxylase	ACR77526	177.317	45.274	-3.91654	0.0133089	6	P:flavonoid biosynthetic process; F:naringenin 3-dioxygenase activity; F:L-ascorbic acid binding; F:iron ion binding; P:oxidation reduction; F:oxidoreductase activity, acting on single donors with incorporation of molecular oxygen, incorporation of two at
Cit.30458.1.S1_s_at	chalcone synthase	Q9XJ57	1153.5	296.78	-3.88683	0.0228811	3	F:acyltransferase activity; F:naringenin-chalcone synthase activity; P:flavonoid biosynthetic process
Cit.5085.1.S1_at	protein	XP_002279421	142.698	36.8068	-3.87696	0.0251206	2	F:molecular_function; P:biological_process
Cit.9817.1.S1_s_at	---NA---		1050.82	274.281	-3.83123	0.0234795	0
Cit.10824.1.S1_at	udp rhamnose:anthocyanidin-3-glucoside rhamnosyltransferase	ABA18631	426.098	112.293	-3.7945	0.0447647	2	F:transferase activity, transferring hexosyl groups; P:metabolic process
Cit.39637.1.S1_x_at	---NA---		134.101	35.4276	-3.78524	0.00419712	0
Cit.15744.1.S1_at	---NA---		67.4628	17.8307	-3.78353	0.0397882	0
Cit.10183.1.S1_at	aldo keto	XP_002273300	338.375	90.607	-3.73455	0.000754541	2	F:oxidoreductase activity; P:oxidation reduction
Cit.5968.1.S1_at	membrane transporter protein	XP_002327961	1104.52	295.823	-3.73377	0.000556468	8	P:myo-inositol transport; C:plant-type vacuole membrane; C:cytoplasmic membrane-bounded vesicle; P:transmembrane transport; F:sugar:hydrogen symporter activity; P:carbohydrate transport; C:integral to membrane; F:myo-inositol:hydrogen symporter activity
Cit.326.1.S1_s_at	mip pip subfamily	XP_002519539	1303.25	349.561	-3.72835	0.0423304	3	P:transport; C:integral to membrane; F:transporter activity
Cit.2476.1.S1_at	flavone synthase ii	BAF49323	505.936	136.679	-3.70165	0.00908028	3	C:membrane; F:monooxygenase activity; F:iron ion binding
Cit.21179.1.S1_at	chalcone synthase	Q9XJ57	1008.45	276.302	-3.64984	0.00746596	3	F:acyltransferase activity; F:naringenin-chalcone synthase activity; P:flavonoid biosynthetic process
Cit.29368.1.S1_x_at	miraculin-like protein 2	BAE79511	10183.9	2804.25	-3.63154	0.0480515	1	F:endopeptidase inhibitor activity
Cit.9817.1.S1_at	---NA---		224.506	62.4414	-3.59546	0.0243646	0
Cit.19716.1.S1_x_at	---NA---		2396.64	666.948	-3.59334	0.00585496	0
Cit.34096.1.S1_s_at	peroxidase 27	XP_002520704	151.18	42.6472	-3.54489	0.02428	6	F:heme binding; P:oxidation reduction; F:peroxidase activity; F:electron carrier activity; F:calcium ion binding; P:response to oxidative stress
Cit.10353.1.S1_at	p-coumaroyl shikimate 3 - hydroxylase	ABY85195	1297.84	367.011	-3.53623	0.0167826	11	C:microsome; P:flavonoid biosynthetic process; C:plasma membrane; F:electron carrier activity; F:heme binding; F:p-coumarate 3-hydroxylase activity; P:oxidation reduction; P:lignin biosynthetic process; C:integral to membrane; P:coumarin biosynthetic proc
Cit.2890.1.S1_s_at	flavanone 3-hydroxylase	BAA36553	207.114	59.5088	-3.48038	0.0186476	6	P:flavonoid biosynthetic process; F:naringenin 3-dioxygenase activity; F:L-ascorbic acid binding; F:iron ion binding; P:oxidation reduction; F:oxidoreductase activity, acting on single donors with incorporation of molecular oxygen, incorporation of two at
Cit.30703.1.S1_at	cytochrome p450	XP_002521317	340.946	98.6242	-3.45702	0.0140576	2	F:oxidoreductase activity; F:iron ion binding
Cit.16117.1.S1_at	---NA---		41.666	12.0628	-3.45411	0.0497629	0
Cit.4882.1.S1_s_at	utp-glucose glucosyltransferase	XP_002310203	113.915	33.1549	-3.43583	0.0248952	2	P:lignin metabolic process; F:coniferyl-alcohol glucosyltransferase activity
Cit.26263.1.S1_at	cytochrome p450	XP_002281995	82.7129	24.0799	-3.43494	0.0368622	4	F:heme binding; P:oxidation reduction; F:monooxygenase activity; F:electron carrier activity
Cit.20561.1.S1_at	---NA---		317.737	92.7362	-3.42625	0.0401492	0
Cit.12037.1.S1_at	---NA---		113.546	33.2804	-3.41179	0.013152	0
Cit.27871.1.S1_at	---NA---		27.2358	8.04532	-3.3853	0.000214322	0
Cit.31057.1.S1_s_at	alcohol acyl transferase	ABW81204	81.7689	24.1934	-3.3798	0.0203358	1	F:transferase activity
Cit.2307.1.S1_at	predicted protein [Populus trichocarpa]	XP_002319194	331.844	99.0174	-3.35137	0.00990775	0
Cit.23537.1.S1_at	---NA---		31.2356	9.45122	-3.30492	0.00251987	0
Cit.1928.1.S1_s_at	protein	XP_002285446	948.721	287.421	-3.30083	0.0244976	3	C:apoplast; C:plasma membrane; C:plant-type cell wall
Cit.35116.1.S1_s_at	cytochrome p450	AAD47832	100.671	30.6941	-3.27981	0.0108428	1	F:metal ion binding
Cit.17740.1.S1_s_at	phenylalanine ammonia-lyase	CAB42794	4919.17	1504.74	-3.2693	0.00491053	6	C:cytoplasm; F:phenylalanine ammonia-lyase activity; F:ammonia ligase activity; P:phenylpropanoid metabolic process; P:biosynthetic process; P:L-phenylalanine catabolic process
Cit.281.1.S1_x_at	protein	XP_002514356	210.177	64.463	-3.26043	0.0184421	2	C:cell part; F:oxidoreductase activity
Cit.721.1.S1_x_at	---NA---		1484.33	456.705	-3.25013	0.0453235	0
Cit.17929.1.S1_s_at	---NA---		131.361	40.493	-3.24403	0.00259959	0
Cit.661.1.S1_s_at	protein	CBI20974	1400.57	432.813	-3.23607	0.0187204	3	C:cytoplasmic membrane-bounded vesicle; P:metabolic process; F:oxidoreductase activity
Cit.29478.1.S1_s_at	cytochrome	XP_002510313	514.298	159.858	-3.21721	0.0226706	1	F:metal ion binding
Cit.1801.1.S1_at	cinnamoyl- reductase	XP_002269382	701.179	218.35	-3.21127	0.00067107	4	C:plasma membrane; P:lignin biosynthetic process; F:coenzyme binding; F:catalytic activity
Cit.29489.1.S1_at	cytochrome p450 probable flavone synthase	ACB56919	443.98	138.411	-3.20766	0.0450499	3	C:membrane; F:monooxygenase activity; F:iron ion binding
Cit.376.1.S1_x_at	---NA---		2478.58	778.353	-3.18449	0.0438431	0
Cit.712.1.S1_x_at	---NA---		157.524	49.6028	-3.17573	0.0269614	0
Cit.2475.1.S1_at	flavone synthase ii	XP_002319566	1022.16	322.03	-3.17408	0.0287434	5	F:heme binding; F:licodione synthase activity; C:integral to membrane; P:oxidation reduction; F:electron carrier activity
Cit.21372.1.S1_at	---NA---		176.81	56.0095	-3.15679	0.00665162	0
Cit.375.1.S1_x_at	polyubiquitin	CBI22354	72.5508	23.2463	-3.12097	0.0202843	5	C:cytoplasm; P:protein modification process; F:protein binding; P:ubiquitin-dependent protein catabolic process; C:nucleus
Cit.1775.1.S1_s_at	protein	ACA04032	876.208	280.788	-3.12053	0.017705	2	F:transferase activity, transferring hexosyl groups; P:carbohydrate biosynthetic process
Cit.40341.1.S1_x_at	---NA---		464.908	149.647	-3.10669	0.0320483	0
Cit.6443.1.S1_s_at	at1g65900 f12p19_7	XP_002327566	553.907	180.183	-3.07412	0.0430897	1	C:cytoplasmic membrane-bounded vesicle
Cit.4610.1.S1_s_at	cytochrome p450	XP_002521317	251.845	82.0749	-3.06846	0.0337608	4	F:heme binding; P:oxidation reduction; F:monooxygenase activity; F:electron carrier activity
Cit.13287.1.S1_s_at	cytochrome p450	XP_002298347	730.186	239.566	-3.04795	0.00521906	9	P:response to water deprivation; P:abscisic acid catabolic process; P:release of seed from dormancy; F:electron carrier activity; F:heme binding; P:oxidation reduction; F:oxygen binding; P:response to red light; F:(+)-abscisic acid 8'-hydroxylase activity
Cit.8444.1.S1_s_at	cytosolic class i small heat-shock protein	XP_002533590	66.4294	21.841	-3.0415	0.0225973	1	P:response to heat
Cit.29350.1.S1_at	unknown [Glycine max]	ACU15729	68.4339	23.1383	-2.95762	0.0153985	0
Cit.29489.1.S1_s_at	cytochrome p450 probable flavone synthase	ACB56919	981.783	334.671	-2.93357	0.0167241	3	C:membrane; F:monooxygenase activity; F:iron ion binding
Cit.21996.1.S1_at	unnamed protein product [Vitis vinifera]	CBI29866	196.118	68.0815	-2.88064	0.0339357	0
Cit.5497.1.S1_at	l-ascorbate peroxidase	XP_002327746	338.202	118.136	-2.8628	0.00236522	9	C:vacuole; P:response to oxidative stress; C:plasma membrane; C:peroxisomal membrane; F:heme binding; P:oxidation reduction; F:L-ascorbate peroxidase activity; C:chloroplast; C:mitochondrion
Cit.12539.1.S1_at	protein	XP_002265942	452.973	158.884	-2.85098	0.0168904	1	F:phosphatidylethanolamine binding
Cit.24965.1.S1_at	---NA---		32.5953	11.5554	-2.82079	0.00415033	0
Cit.23189.1.S1_at	white-brown-complex abc transporter family	XP_002306254	148.23	52.5766	-2.81932	0.00103171	3	C:membrane; F:ATPase activity; F:ATP binding
Cit.16900.1.S1_x_at	---NA---		1741.12	618.012	-2.81734	0.0462004	0
Cit.15057.1.S1_s_at	---NA---		375.797	133.842	-2.80777	0.0333121	0
Cit.14829.1.S1_at	cytochrome p450	CBI24045	230.531	83.2639	-2.76869	0.0118512	4	F:heme binding; P:oxidation reduction; F:monooxygenase activity; F:electron carrier activity
Cit.24435.1.S1_s_at	tryptophan synthase beta-subunit	XP_002264829	128.316	46.5894	-2.7542	0.041661	6	P:indoleacetic acid biosynthetic process; P:response to oxidative stress; F:tryptophan synthase activity; C:chloroplast stroma; P:tryptophan biosynthetic process; F:pyridoxal phosphate binding
Cit.21765.1.S1_s_at	---NA---		1841.54	670.396	-2.74697	0.018315	0
Cit.12113.1.S1_s_at	proton-dependent oligopeptide transport family protein	XP_002520155	1085.69	397.552	-2.73085	0.00223112	6	P:suspensor development; P:oligopeptide transport; C:plasma membrane; P:embryonic development ending in seed dormancy; P:cellular response to nitrogen levels; F:transporter activity
Cit.21713.1.S1_x_at	---NA---		19.6746	7.22656	-2.72253	0.000301536	0
Cit.6307.1.S1_at	glutathione s-transferase	P57108	50.9814	18.732	-2.72163	0.00940996	3	C:cytoplasm; F:glutathione transferase activity; P:aromatic amino acid family metabolic process
Cit.28372.1.S1_at	cinnamoyl- reductase	XP_002269382	386.979	142.212	-2.72115	0.000674874	5	P:steroid biosynthetic process; F:3-beta-hydroxy-delta5-steroid dehydrogenase activity; C:plasma membrane; P:lignin biosynthetic process; F:coenzyme binding
Cit.35493.1.S1_s_at	---NA---		496.906	183.321	-2.71059	0.0231497	0
Cit.6704.1.S1_at	tryptophan synthase beta-subunit	XP_002264829	113.069	41.7635	-2.70735	0.0360142	6	P:indoleacetic acid biosynthetic process; P:response to oxidative stress; F:tryptophan synthase activity; C:chloroplast stroma; P:tryptophan biosynthetic process; F:pyridoxal phosphate binding
Cit.28943.1.S1_s_at	unnamed protein product [Vitis vinifera]	CBI14908	1387.05	513.493	-2.70117	0.015171	0
Cit.100.1.S1_x_at	---NA---		1998.08	743.506	-2.68744	0.0462382	0
Cit.18521.1.S1_at	2-oxoglutarate-dependent dioxygenase	XP_002330269	1095.52	408.553	-2.68151	0.00907006	3	P:oxidation reduction; F:oxidoreductase activity; F:iron ion binding
Cit.381.1.S1_s_at	monooxygenase fad-binding	XP_002282242	2091.61	781.488	-2.67653	0.0454209	3	C:cytoplasmic membrane-bounded vesicle; P:metabolic process; F:oxidoreductase activity
Cit.29937.1.S1_s_at	membrane transporter protein	XP_002327961	490.531	183.338	-2.67556	1.22673e-05	8	P:myo-inositol transport; C:plant-type vacuole membrane; C:cytoplasmic membrane-bounded vesicle; P:transmembrane transport; F:sugar:hydrogen symporter activity; P:carbohydrate transport; C:integral to membrane; F:myo-inositol:hydrogen symporter activity
Cit.4403.1.S1_at	protein	XP_002529745	3426.93	1295.33	-2.64566	0.0014294	8	P:myo-inositol transport; C:plant-type vacuole membrane; C:cytoplasmic membrane-bounded vesicle; P:transmembrane transport; F:sugar:hydrogen symporter activity; P:carbohydrate transport; C:integral to membrane; F:myo-inositol:hydrogen symporter activity
Cit.7165.1.S1_at	retroelement pol polyprotein	CAN82073	314.072	119.64	-2.62513	0.00134031	1	F:nucleic acid binding
Cit.2373.1.S1_s_at	cytochrome	XP_002284031	725.353	278.04	-2.6088	0.0256868	1	F:metal ion binding
Cit.6511.1.S1_at	---NA---		28.9723	11.1109	-2.60756	0.029861	0
Cit.11552.1.S1_s_at	cytochrome p450	XP_002522721	146.278	56.1413	-2.60552	0.0110058	3	C:cytoplasmic membrane-bounded vesicle; F:oxidoreductase activity; F:iron ion binding
Cit.8509.1.S1_s_at	peroxidase	ABG49115	182.923	70.2219	-2.60491	0.00385349	8	C:vacuole; P:hydrogen peroxide catabolic process; F:electron carrier activity; F:heme binding; P:oxidation reduction; F:calcium ion binding; F:peroxidase activity; C:extracellular region
Cit.11987.1.S1_s_at	4-coumarate: ligase	XP_002520028	443.362	171.206	-2.58964	0.0254018	6	P:response to wounding; P:phenylpropanoid metabolic process; P:pollen exine formation; P:defense response to fungus; F:4-coumarate-CoA ligase activity; P:response to UV
Cit.6998.1.S1_at	protein	XP_002326109	221.944	85.8217	-2.5861	0.0155939	1	F:transferase activity
Cit.22713.1.S1_at	---NA---		76.217	29.747	-2.56217	0.0432893	0
Cit.17300.1.S1_at	protein	XP_002321926	1238.95	485.827	-2.55025	0.0136184	3	C:vacuole; C:plasma membrane; C:endoplasmic reticulum
Cit.11055.1.S1_s_at	protein	ACJ85167	1147.28	451.055	-2.54363	0.00331476	2	F:molecular_function; P:biological_process
Cit.40508.1.S1_s_at	jaz8 (jasmonate-zim-domain protein 8)	XP_002519662	36.7902	14.4751	-2.54163	0.000427562	3	F:molecular_function; P:biological_process; C:cellular_component
Cit.12930.1.S1_at	protein	XP_002522972	513.849	202.752	-2.53438	0.00952127	1	C:chloroplast
Cit.5655.1.S1_at	thromboxane-a synthase	XP_002516084	120.219	47.4998	-2.53092	0.0153764	12	P:secondary shoot formation; C:mitochondrion; P:auxin polar transport; P:oxidation reduction; P:carotenoid biosynthetic process; P:regulation of meristem organization; F:electron carrier activity; P:positive regulation of flavonoid biosynthetic process; F
Cit.17913.1.S1_at	protein	XP_002517893	93.8048	37.2038	-2.52137	0.0460545	0
Cit.22427.1.S1_s_at	cytochrome c oxidoreductase	XP_002512453	436.679	173.933	-2.51062	0.00657742	1	C:membrane
Cit.2027.1.S1_s_at	stachyose synthase	XP_002327943	3168.75	1265.16	-2.50477	0.00616522	7	P:sucrose biosynthetic process; F:hydrolase activity, hydrolyzing O-glycosyl compounds; F:galactinol-sucrose galactosyltransferase activity; F:kinase activity; F:protein binding; P:raffinose family oligosaccharide biosynthetic process; P:mannitol biosynth
Cit.1800.1.S1_at	cinnamoyl- reductase	XP_002328740	494.35	197.374	-2.50464	0.00216412	4	P:lignin biosynthetic process; F:catalytic activity; F:coenzyme binding; C:plasma membrane
Cit.19897.1.S1_s_at	lhy (late elongated hypocotyl) dna binding transcription factor	XP_002301449	1020.62	407.925	-2.50199	0.00612545	11	P:response to jasmonic acid stimulus; P:response to gibberellin stimulus; P:response to salt stress; P:response to salicylic acid stimulus; F:DNA binding; P:response to auxin stimulus; P:long-day photoperiodism, flowering; P:response to abscisic acid stim
Cit.22262.1.S1_at	myb-related transcription factor	XP_002264150	203.698	81.5306	-2.49841	0.0173189	4	F:DNA binding; P:regulation of transcription; F:transcription activator activity; C:nucleus
Cit.18040.1.S1_at	---NA---		32.6201	13.0758	-2.4947	0.038299	0
Cit.4501.1.S1_s_at	protein	XP_002301594	337.946	135.898	-2.48677	0.00946334	1	F:calcium ion binding
Cit.38047.1.S1_at	---NA---		609.115	245.609	-2.48002	0.0116775	0
Cit.29406.1.S1_s_at	transcription factor lhy	AAU20773	797.87	322.137	-2.47681	0.00272679	1	F:binding
Cit.16075.1.S1_at	oligopeptide transporter opt family	XP_002518903	590.474	238.89	-2.47174	0.0020542	3	P:response to nematode; P:oligopeptide transport; F:oligopeptide transporter activity
Cit.29521.1.S1_at	serine threonine-protein kinase	XP_002524221	485.279	196.859	-2.46511	0.028226	2	F:chromatin binding; F:Ran GTPase binding
Cit.15643.1.S1_s_at	cytochrome p450	XP_002281995	198.22	80.4706	-2.46326	0.028957	4	F:heme binding; P:oxidation reduction; F:monooxygenase activity; F:electron carrier activity
Cit.24936.1.S1_at	beta-	XP_002523075	33.5739	13.735	-2.44442	0.0423378	4	C:endomembrane system; P:carbohydrate metabolic process; F:hydrolase activity, hydrolyzing O-glycosyl compounds; F:cation binding
Cit.18527.1.S1_s_at	patatin t5 precursor	XP_002451118	1136.51	466.664	-2.43548	0.00236203	2	P:lipid catabolic process; F:hydrolase activity
Cit.31164.1.S1_at	---NA---		124.453	51.1201	-2.43453	0.0241827	0
Cit.29576.1.S1_s_at	---NA---		130.938	54.1496	-2.41809	0.0298093	0
Cit.17300.1.S1_s_at	protein	XP_002321926	563.734	235.451	-2.39428	0.0192096	3	C:vacuole; C:plasma membrane; C:endoplasmic reticulum
Cit.31724.1.S1_at	lanatoside 15 -o-acetylesterase	XP_002320844	118.647	49.6682	-2.38879	0.0170667	4	F:hydrolase activity, acting on ester bonds; C:endomembrane system; C:cytoplasmic membrane-bounded vesicle; P:lipid metabolic process
Cit.9074.1.S1_s_at	protein	ACU13579	4765.79	2030.61	-2.34703	0.00942902	2	C:anchored to membrane; C:plasma membrane
Cit.22293.1.S1_at	disease resistance protein	XP_002332999	169.513	73.2801	-2.31322	0.0299438	1	F:binding
Cit.964.1.S1_s_at	2-dehydro-3-deoxyphosphoheptonate aldolase 3-deoxy-d-arabino-heptulosonate 7-phosphate synthetase	XP_002301067	2758.18	1192.94	-2.3121	0.032346	7	P:shikimate biosynthetic process; P:chorismate biosynthetic process; F:3-deoxy-7-phosphoheptulonate synthase activity; P:aromatic amino acid family biosynthetic process; F:lyase activity; C:chloroplast; C:membrane
Cit.16254.1.S1_at	stearoyl-acyl carrier protein desaturase	XP_002514780	123.745	53.7573	-2.30192	0.00970594	5	P:fatty acid biosynthetic process; F:transition metal ion binding; P:oxidation reduction; F:acyl-[acyl-carrier-protein] desaturase activity; C:chloroplast stroma
Cit.2834.1.S1_s_at	protein	XP_002312525	380.249	165.623	-2.29588	0.0142386	2	P:metabolic process; F:hydrolase activity
Cit.15999.1.S1_at	dna binding	XP_002299425	261.048	113.802	-2.29387	0.00328578	3	F:transcription regulator activity; P:regulation of transcription; C:nucleus
Cit.28483.1.S1_at	mads box	XP_002514037	57.0945	24.9201	-2.29109	0.0312836	1	F:DNA binding
Cit.36633.1.S1_s_at	glycine-rich protein	BAA92155	783.397	343.077	-2.28344	0.039639	0
Cit.11055.1.S1_at	protein	ACJ85167	406.15	179.053	-2.26832	0.00924964	2	F:molecular_function; P:biological_process
Cit.15543.1.S1_at	protein	XP_002330560	85.02	37.8203	-2.248	0.0110972	2	F:oxidoreductase activity; F:FAD binding
Cit.23345.1.S1_a_at	---NA---		605.709	269.823	-2.24483	0.0252416	0
Cit.174.1.S1_at	---NA---		139.999	62.9961	-2.22234	0.031366	0
Cit.20520.1.S1_at	---NA---		253.108	114.108	-2.21815	0.00502097	0
Cit.16236.1.S1_at	spx (syg1 pho81 xpr1) domain-containing protein	XP_002511779	54.8424	24.7465	-2.21617	0.0136258	2	C:plant-type vacuole; C:membrane
Cit.13651.1.S1_at	ap2 erf domain-containing transcription factor	XP_002280924	151.667	68.6392	-2.20962	0.0267835	5	P:regulation of transcription, DNA-dependent; P:transcription; F:DNA binding; F:transcription factor activity; C:nucleus
Cit.19626.1.S1_at	---NA---		34.6144	15.6729	-2.20856	0.0492158	0
Cit.14285.1.S1_at	heparanase-like protein 2 expressed	XP_002321464	56.2199	25.4814	-2.20631	0.0410135	3	C:cytoplasmic membrane-bounded vesicle; C:plant-type cell wall; F:beta-glucuronidase activity
Cit.17693.1.S1_s_at	protein	ACN88681	553.335	251.766	-2.19781	0.00164481	12	P:defense response to bacterium; P:response to jasmonic acid stimulus; F:mannose-1-phosphate guanylyltransferase (GDP) activity; F:GDP-galactose:myoinositol-1-phosphate guanyltransferase activity; F:galactose-1-phosphate guanylyltransferase (GDP) activity
Cit.15191.1.S1_s_at	LIGULELESS1 protein, putative [Ricinus communis]	XP_002514625	117.565	53.5398	-2.19583	0.0038582	2	F:DNA binding; C:nucleus
Cit.18427.1.S1_at	---NA---		85.609	39.3658	-2.1747	6.42195e-05	0
Cit.3921.1.S1_at	mip nip subfamily	XP_002527308	90.199	41.658	-2.16523	0.0260874	8	C:plasma membrane; F:glycerol transmembrane transporter activity; F:urea transmembrane transporter activity; C:integral to membrane; F:water channel activity; P:boron transport; C:plastid; F:boron transporter activity
Cit.29376.1.S1_s_at	superoxide dismutase	ABY48757	2377.29	1098.56	-2.1641	0.00997834	7	F:iron ion binding; F:superoxide dismutase activity; P:oxidation reduction; C:nucleoid; P:superoxide metabolic process; C:chloroplast; P:response to UV
Cit.20336.1.S1_at	kip-related cyclin-dependent kinase inhibitor 6	XP_002518785	492.391	228.107	-2.15858	0.00895107	2	F:protein binding; P:cell cycle process
Cit.12932.1.S1_s_at	protein	XP_002319304	2240.03	1038.94	-2.1561	0.0108623	1	C:chloroplast
Cit.14302.1.S1_at	protein	XP_002267938	79.0931	36.943	-2.14095	0.0226535	1	P:cytoskeleton organization
Cit.30683.1.S1_at	short chain alcohol dehydrogenase-like	XP_002282755	184.933	86.4546	-2.13908	0.0301335	3	P:oxidation reduction; F:oxidoreductase activity; F:binding
Cit.30618.1.S1_s_at	at5g37260-like protein	CBI27347	189.429	88.9751	-2.129	2.13936e-05	3	F:DNA binding; P:regulation of transcription; C:nucleus
Cit.17233.1.S1_at	ferrodoxin precursor	AAW64931	5486.23	2580.26	-2.12611	0.0257084	7	F:electron carrier activity; F:iron ion binding; F:protein binding; P:transport; C:chloroplast stroma; F:2 iron, 2 sulfur cluster binding; P:electron transport chain
Cit.6863.1.S1_at	---NA---		31.9457	15.0505	-2.12257	0.0232556	0
Cit.23365.1.S1_at	---NA---		260.493	122.989	-2.118	0.0275431	0
Cit.29521.1.S1_x_at	serine threonine-protein kinase	XP_002524221	441.46	208.838	-2.11389	0.0416997	2	F:chromatin binding; F:Ran GTPase binding
Cit.36604.1.S1_at	late embryogenesis	XP_002315470	121.325	57.66	-2.10415	0.00133799	1	F:zinc ion binding
Cit.10380.1.S1_s_at	gamma-glutamyl hydrolase	XP_002524523	152.019	72.485	-2.09725	0.0479764	5	P:tetrahydrofolylpolyglutamate metabolic process; C:vacuole; P:glutamine metabolic process; C:cytoplasmic membrane-bounded vesicle; F:omega peptidase activity
Cit.28445.1.S1_at	---NA---		53.6929	25.6243	-2.09539	0.0166204	0
Cit.11964.1.S1_s_at	cytochrome p450	XP_002312905	71.6726	34.2167	-2.09467	0.0375351	8	C:microsome; C:cytoplasmic membrane-bounded vesicle; F:electron carrier activity; F:heme binding; F:fatty acid (omega-1)-hydroxylase activity; F:oxygen binding; C:mitochondrion; P:electron transport chain
Cit.8454.1.S1_at	PREDICTED: hypothetical protein isoform 2 [Vitis vinifera]	XP_002284555	109.433	52.2696	-2.09364	0.00299893	2	F:molecular_function; P:biological_process
Cit.16805.1.S1_at	nbs-lrr type disease resistance protein	AAN62353	130.558	62.4171	-2.0917	0.00414	1	F:nucleotide binding
Cit.15251.1.S1_at	protein	XP_002305433	100.549	48.0798	-2.09128	0.0389953	1	F:catalytic activity
Cit.22748.1.S1_x_at	af283537_1lectin-related protein precursor	AAG38522	79.5059	38.0422	-2.08994	0.0493178	1	F:sugar binding
Cit.4914.1.S1_at	protein	XP_002301033	116.309	55.8003	-2.08438	0.0418499	2	C:anchored to plasma membrane; C:cytoplasmic membrane-bounded vesicle
Cit.11492.1.S1_s_at	thylakoid soluble phosphoprotein	XP_002525607	3037.78	1459.04	-2.08209	0.00780236	2	C:chloroplast thylakoid membrane; C:chloroplast envelope
Cit.30257.1.S1_at	white-brown-complex abc transporter family	CAN81791	87.1906	42.0449	-2.07376	0.000996465	3	C:membrane; F:ATPase activity; F:ATP binding
Cit.21940.1.S1_s_at	soul heme-binding family protein	XP_002322949	1032.91	498.144	-2.07356	0.034611	0
Cit.29619.1.S1_s_at	dna binding	XP_002301432	106.612	51.4754	-2.07112	0.0467312	1	F:protein binding
Cit.38304.1.S1_at	tir-nbs-lrr resistance protein	XP_002272034	34.6259	16.72	-2.07093	0.0131496	2	P:cellular process; F:nucleotide binding
Cit.36889.1.S1_at	4-coumarate: ligase	XP_002533186	293.955	142.039	-2.06954	0.00201698	2	P:metabolic process; F:4-coumarate-CoA ligase activity
Cit.10280.1.S1_x_at	alkaline alpha galactosidase	XP_002322710	1996.7	965.679	-2.06773	0.00693049	2	F:hydrolase activity, hydrolyzing O-glycosyl compounds; F:galactinol-sucrose galactosyltransferase activity
Cit.19786.1.S1_s_at	calcium ion binding	XP_002298903	148.105	71.6975	-2.06569	0.0091016	10	C:plant-type vacuole; F:DNA binding; P:regulation of ARF protein signal transduction; F:ARF guanyl-nucleotide exchange factor activity; C:cytoplasmic membrane-bounded vesicle; C:plasma membrane; C:vacuolar membrane; F:calcium ion binding; C:integral to me
Cit.4296.1.S1_at	udp-glucosyltransferase family 1 protein	ACS87994	617.789	299.514	-2.06264	0.020596	1	F:transferase activity, transferring glycosyl groups
Cit.21052.1.S1_at	protein	XP_002316755	717.249	347.748	-2.06256	0.00766433	10	P:defense response to bacterium; P:response to jasmonic acid stimulus; F:mannose-1-phosphate guanylyltransferase (GDP) activity; F:GDP-galactose:myoinositol-1-phosphate guanyltransferase activity; F:galactose-1-phosphate guanylyltransferase (GDP) activity
Cit.17027.1.S1_s_at	transcription factor lhy	XP_002515093	979.825	475.167	-2.06206	0.0209334	3	P:regulation of transcription; F:DNA binding; C:nucleus
Cit.17463.1.S1_at	membrane glycoprotein hp59	XP_002323555	565.883	274.999	-2.05777	0.00716738	5	C:membrane; C:mitochondrion; C:plastid; P:transport; F:transporter activity
Cit.17567.1.S1_at	protein	XP_002270738	217.376	105.647	-2.05756	0.00665186	2	F:molecular_function; P:biological_process
Cit.4577.1.S1_s_at	protein	XP_002282172	779.162	379.646	-2.05233	0.0415782	0
Cit.16813.1.S1_at	ac084762_10 far-red impaired response protein	BAH92175	144.898	70.8507	-2.04511	0.028605	0
Cit.38507.1.S1_at	predicted protein [Populus trichocarpa]	XP_002302513	656.895	322.736	-2.0354	0.0150413	1	F:binding
Cit.2725.1.S1_s_at	tha1 (threonine aldolase 1) aldehyde-lyase threonine aldolase	XP_002266992	611.912	301.648	-2.02858	0.00302184	3	F:pyridoxal phosphate binding; P:threonine catabolic process; F:threonine aldolase activity
Cit.16903.1.S1_x_at	---NA---		1549.08	764.875	-2.02528	0.0110604	0
Cit.2892.1.S1_at	serine threonine-protein kinase	XP_002311188	2083.65	1029.62	-2.02378	0.0109899	2	F:chromatin binding; F:Ran GTPase binding
Cit.1960.1.S1_s_at	protein	AAF98369	1026.56	507.699	-2.02205	0.00353058	2	P:lipid catabolic process; F:hydrolase activity
Cit.21112.1.S1_s_at	at1g79260 yup8h12r_40	XP_002316162	400.148	198.288	-2.01802	0.00115148	1	P:transport
Cit.15579.1.S1_at	atp binding	XP_002269404	269.746	133.693	-2.01764	0.00430618	2	C:intracellular membrane-bounded organelle; C:cytoplasmic part
Cit.25119.1.S1_at	protein	XP_002268572	706.771	350.551	-2.01617	0.00121258	3	F:molecular_function; P:biological_process; C:cellular_component
Cit.15800.1.S1_at	protein	XP_002515262	24.4264	12.1206	-2.01528	0.0378237	5	C:endomembrane system; F:heme binding; C:cytoplasmic membrane-bounded vesicle; P:oxidation reduction; F:carbohydrate binding
Cit.15538.1.S1_at	peroxisomal -dienoyl- reductase	XP_002523653	275.405	136.982	-2.01051	0.000457675	5	C:peroxisome; P:oxidation reduction; F:oxidoreductase activity; F:binding; C:plasma membrane
Cit.6275.1.S1_at	protein	XP_002510385	912.095	454.804	-2.00547	0.00156187	2	F:zinc ion binding; F:ubiquitin-protein ligase activity
Cit.10277.1.S1_s_at	alkaline alpha galactosidase	XP_002308957	6094.11	3040.52	-2.00428	0.0413481	1	F:hydrolase activity, hydrolyzing O-glycosyl compounds
Cit.14278.1.S1_at	protein	XP_002311654	410.549	204.891	-2.00374	0.0266354	2	C:membrane; C:chloroplast envelope
Cit.39867.1.S1_s_at	tryptophan synthase beta	XP_002264829	23.9717	11.9639	-2.00367	0.0417551	6	P:indoleacetic acid biosynthetic process; P:response to oxidative stress; F:tryptophan synthase activity; C:chloroplast stroma; P:tryptophan biosynthetic process; F:pyridoxal phosphate binding

## Sheet: Supplemental Table 3
Supplemental Table S3: KEGG pathways of upregulated DEGs in TG9
Pathway	Num of probes	Enzyme	Ezyme ID	Probes ID
1. Metabolism
1.1 Carbohydrate Metabolism	14
Glycolysis / Gluconeogenesis	2	pyruvate kinase	ec:2.7.1.40	Cit.13055.1.S1_at
		fructose-bisphosphate aldolase	ec:4.1.2.13	Cit.36204.1.S1_s_at
Citrate cycle (TCA cycle)	1	citrate (Si)-synthase	ec:2.3.3.1	Cit.20853.1.S1_at
		ATP citrate synthase	ec:2.3.3.8	Cit.20853.1.S1_at
Pentose phosphate pathway	2	6-phosphogluconolactonase	ec:3.1.1.31	Cit.10722.1.S1_s_at
		fructose-bisphosphate aldolase	ec:4.1.2.13	Cit.36204.1.S1_s_at
Fructose and mannose metabolism	1	fructose-bisphosphate aldolase	ec:4.1.2.13	Cit.36204.1.S1_s_at
Galactose metabolism	1	beta-fructofuranosidase	ec:3.2.1.26	Cit.5734.1.S1_at
Starch and sucrose metabolism	4	glucan endo-1,3-beta-D-glucosidase	ec:3.2.1.39	Cit.9703.1.S1_at, Cit.9704.1.S1_at, Cit.9706.1.S1_s_at
		beta-fructofuranosidase	ec:3.2.1.26	Cit.5734.1.S1_at
Amino sugar and nucleotide sugar metabolism	3	chitinase	ec:3.2.1.14	Cit.14913.1.S1_at, Cit.15242.1.S1_at, Cit.21717.1.S1_at
Pyruvate metabolism	2	pyruvate kinase	ec:2.7.1.40	Cit.13055.1.S1_at
		hydroxyacylglutathione hydrolase	ec:3.1.2.6	Cit.11040.1.S1_at
Glyoxylate and dicarboxylate metabolism	1	citrate (Si)-synthase	ec:2.3.3.1	Cit.20853.1.S1_at
Inositol phosphate metabolism	1	phosphoinositide phospholipase C	ec:3.1.4.11	Cit.24350.1.S1_at
1.2 Energy Metabolism	6
Oxidative phosphorylation	1	H+-transporting two-sector ATPase	ec:3.6.3.14	Cit.2776.1.S1_at
Photosynthesis	1	H+-transporting two-sector ATPase	ec:3.6.3.14	Cit.2776.1.S1_at
Carbon fixation in photosynthetic organisms	2	pyruvate kinase	ec:2.7.1.40	Cit.13055.1.S1_at
		fructose-bisphosphate aldolase	ec:4.1.2.13	Cit.36204.1.S1_s_at
Reductive carboxylate cycle (CO2 fixation)	1	ATP citrate synthase	ec:2.3.3.8	Cit.20853.1.S1_at
Methane metabolism	2	peroxidase	ec:1.11.1.7	Cit.2333.1.S1_at, Cit.3949.1.S1_s_at
1.3 Lipid Metabolism	5
Glycerophospholipid metabolism	1	phospholipase D	ec:3.1.4.4	Cit.6097.1.S1_s_at
Ether lipid metabolism	1	phospholipase D	ec:3.1.4.4	Cit.6097.1.S1_s_at
Sphingolipid metabolism	1	serine C-palmitoyltransferase	ec:2.3.1.50	Cit.4146.1.S1_at
Arachidonic acid metabolism	1	glutathione peroxidase	ec:1.11.1.9	Cit.9510.1.S1_s_at
Linoleic acid metabolism	2	lipoxygenase	ec:1.13.11.12	Cit.10854.1.S1_s_at, Cit.6636.1.S1_at
alpha-Linolenic acid metabolism	2	lipoxygenase	ec:1.13.11.12	Cit.10854.1.S1_s_at, Cit.6636.1.S1_at
1.4 Nucleotide Metabolism	4
Purine metabolism	3	DNA-directed RNA polymerase	ec:2.7.7.6	Cit.4212.1.S1_at
		pyruvate kinase	ec:2.7.1.40	Cit.13055.1.S1_at
		nucleoside-triphosphatase	ec:3.6.1.15	Cit.6364.1.S1_s_at
Pyrimidine metabolism	2	DNA-directed RNA polymerase	ec:2.7.7.6	Cit.4212.1.S1_at
		CTP synthase	ec:6.3.4.2	Cit.32832.1.S1_at
1.5 Amino Acid Metabolism	4
Glycine, serine and threonine metabolism	1	tryptophan synthase	ec:4.2.1.20	Cit.12100.1.S1_at
Phenylalanine metabolism	2	peroxidase	ec:1.11.1.7	Cit.2333.1.S1_at, Cit.3949.1.S1_s_at
Phenylalanine, tyrosine and tryptophan biosynthesis	2	phosphoribosylanthranilate isomerase	ec:5.3.1.24	Cit.25402.1.S1_a_at
		tryptophan synthase	ec:4.2.1.20	Cit.12100.1.S1_at
1.6 Metabolism of Other Amino Acids	6
Glutathione metabolism	6	glutathione transferase	ec:2.5.1.18	Cit.32844.1.S1_s_at, Cit.9510.1.S1_s_at, Cit.9584.1.S1_s_at, Cit.9584.1.S1_x_at, Cit.9587.1.S1_at, Cit.9587.1.S1_x_at
		glutathione peroxidase	ec:1.11.1.9	Cit.9510.1.S1_s_at
1.8 Metabolism of Cofactors and Vitamins	2
Thiamine metabolism	1	nucleoside-triphosphatase	ec:3.6.1.15	Cit.6364.1.S1_s_at
Vitamin B6 metabolism	1	pyridoxal kinase	ec:2.7.1.35	Cit.4131.1.S1_at
1.9 Biosynthesis of Polyketides and Terpenoids	2
Terpenoid backbone biosynthesis	1	farnesyltranstransferase	ec:2.5.1.29	Cit.16303.1.S1_at
		dimethylallyltranstransferase	ec:2.5.1.1	Cit.16303.1.S1_at
Zeatin biosynthesis	1	cis-zeatin O-beta-D-glucosyltransferase	ec:2.4.1.215	Cit.21798.1.S1_at
		trans-zeatin O-beta-D-glucosyltransferase	ec:2.4.1.203	Cit.21798.1.S1_at
1.10 Biosynthesis of Other Secondary Metabolites	3
Phenylpropanoid biosynthesis	2	peroxidase	ec:1.11.1.7	Cit.2333.1.S1_at, Cit.3949.1.S1_s_at
Flavonoid biosynthesis	1	flavanone 3-dioxygenase	ec:1.14.11.9	Cit.16617.1.S1_at
		flavonol synthase	ec:1.14.11.23	Cit.16617.1.S1_at
1.11 Xenobiotics Biodegradation and Metabolism	6
Metabolism of xenobiotics by cytochrome P450	6	glutathione transferase	ec:2.5.1.18	Cit.32844.1.S1_s_at, Cit.9510.1.S1_s_at, Cit.9584.1.S1_s_at, Cit.9584.1.S1_x_at, Cit.9587.1.S1_at, Cit.9587.1.S1_x_at
Drug metabolism - cytochrome P450	6	glutathione transferase	ec:2.5.1.18	Cit.32844.1.S1_s_at, Cit.9510.1.S1_s_at, Cit.9584.1.S1_s_at, Cit.9584.1.S1_x_at, Cit.9587.1.S1_at, Cit.9587.1.S1_x_at
1.12 Overview
Biosynthesis of phenylpropanoids	8	citrate (Si)-synthase	ec:2.3.3.1	Cit.20853.1.S1_at
		phosphoribosylanthranilate isomerase	ec:5.3.1.24	Cit.25402.1.S1_a_at
		flavanone 3-dioxygenase	ec:1.14.11.9	Cit.16617.1.S1_at
		flavonol synthase	ec:1.14.11.23	Cit.16617.1.S1_at
		pyruvate kinase	ec:2.7.1.40	Cit.13055.1.S1_at
		tryptophan synthase	ec:4.2.1.20	Cit.12100.1.S1_at
		peroxidase	ec:1.11.1.7	Cit.2333.1.S1_at, Cit.3949.1.S1_s_at
		fructose-bisphosphate aldolase	ec:4.1.2.13	Cit.36204.1.S1_s_at
		ATP citrate synthase	ec:2.3.3.8	Cit.20853.1.S1_at
Biosynthesis of terpenoids and steroids	4	farnesyltranstransferase	ec:2.5.1.29	Cit.16303.1.S1_at
		citrate (Si)-synthase	ec:2.3.3.1	Cit.20853.1.S1_at
		geranyltranstransferase	ec:2.5.1.10	Cit.16303.1.S1_at
		pyruvate kinase	ec:2.7.1.40	Cit.13055.1.S1_at
		dimethylallyltranstransferase	ec:2.5.1.1	Cit.16303.1.S1_at
		fructose-bisphosphate aldolase	ec:4.1.2.13	Cit.36204.1.S1_s_at
		ATP citrate synthase	ec:2.3.3.8	Cit.20853.1.S1_at
Biosynthesis of alkaloids derived from histidine and purine	4	citrate (Si)-synthase	ec:2.3.3.1	Cit.20853.1.S1_at
		pyruvate kinase	ec:2.7.1.40	Cit.13055.1.S1_at
		6-phosphogluconolactonase	ec:3.1.1.31	Cit.10722.1.S1_s_at
		fructose-bisphosphate aldolase	ec:4.1.2.13	Cit.36204.1.S1_s_at
		ATP citrate synthase	ec:2.3.3.8	Cit.20853.1.S1_at
Biosynthesis of alkaloids derived from ornithine, lysine and nicotinic acid	3	citrate (Si)-synthase	ec:2.3.3.1	Cit.20853.1.S1_at
		pyruvate kinase	ec:2.7.1.40	Cit.13055.1.S1_at
		fructose-bisphosphate aldolase	ec:4.1.2.13	Cit.36204.1.S1_s_at
		ATP citrate synthase	ec:2.3.3.8	Cit.20853.1.S1_at
Biosynthesis of alkaloids derived from shikimate pathway	5	citrate (Si)-synthase	ec:2.3.3.1	Cit.20853.1.S1_at
		phosphoribosylanthranilate isomerase	ec:5.3.1.24	Cit.25402.1.S1_a_at
		pyruvate kinase	ec:2.7.1.40	Cit.13055.1.S1_at
		tryptophan synthase	ec:4.2.1.20	Cit.12100.1.S1_at
		fructose-bisphosphate aldolase	ec:4.1.2.13	Cit.36204.1.S1_s_at
		ATP citrate synthase	ec:2.3.3.8	Cit.20853.1.S1_at
Biosynthesis of alkaloids derived from terpenoid and polyketide	4	farnesyltranstransferase	ec:2.5.1.29	Cit.16303.1.S1_at
		citrate (Si)-synthase	ec:2.3.3.1	Cit.20853.1.S1_at
		geranyltranstransferase	ec:2.5.1.10	Cit.16303.1.S1_at
		pyruvate kinase	ec:2.7.1.40	Cit.13055.1.S1_at
		dimethylallyltranstransferase	ec:2.5.1.1	Cit.16303.1.S1_at
		fructose-bisphosphate aldolase	ec:4.1.2.13	Cit.36204.1.S1_s_at
		ATP citrate synthase	ec:2.3.3.8	Cit.20853.1.S1_at
Biosynthesis of plant hormones	9	farnesyltranstransferase	ec:2.5.1.29	Cit.16303.1.S1_at
		citrate (Si)-synthase	ec:2.3.3.1	Cit.20853.1.S1_at
		phosphoribosylanthranilate isomerase	ec:5.3.1.24	Cit.25402.1.S1_a_at
		geranyltranstransferase	ec:2.5.1.10	Cit.16303.1.S1_at
		pyruvate kinase	ec:2.7.1.40	Cit.13055.1.S1_at
		dimethylallyltranstransferase	ec:2.5.1.1	Cit.16303.1.S1_at
		tryptophan synthase	ec:4.2.1.20	Cit.12100.1.S1_at
		lipoxygenase	ec:1.13.11.12	Cit.10854.1.S1_s_at, Cit.6636.1.S1_at
		6-phosphogluconolactonase	ec:3.1.1.31	Cit.10722.1.S1_s_at
		fructose-bisphosphate aldolase	ec:4.1.2.13	Cit.36204.1.S1_s_at
		ATP citrate synthase	ec:2.3.3.8	Cit.20853.1.S1_at
3. Environmental Information Processing
3.2 Signal Transduction
Phosphatidylinositol signaling system	1	phosphoinositide phospholipase C	ec:3.1.4.11	Cit.24350.1.S1_at
